# Supplementary material
Source: HighWire-hosted journal article supplement (http://qhc.bmj.com/highwire/filestream/147427/field_highwire_adjunct_files/0/online_appendices.pdf)
Supplement: online_appendices.pdf [file online_appendices.pdf]

**Online appendix 1. Socio-demographic differences in reports of doctor patient communication (scale 0-100), by patient experience measure**

**Question 4. Helpfulness of receptionists**

|                           | <b>Overall difference</b> | <b>Standard error</b> | <b>Difference attributable to different evaluation of care within the same practice</b> | <b>Standard error</b> | <b>Difference attributable to concentration of different patient groups in practices with different mean scores</b> | <b>Percentage of overall difference attributable to patient group concentration in practices with different mean scores*</b> |
|---------------------------|---------------------------|-----------------------|-----------------------------------------------------------------------------------------|-----------------------|---------------------------------------------------------------------------------------------------------------------|------------------------------------------------------------------------------------------------------------------------------|
| <b>Gender</b>             |                           |                       |                                                                                         |                       |                                                                                                                     |                                                                                                                              |
| Men (reference)           |                           |                       |                                                                                         |                       |                                                                                                                     |                                                                                                                              |
| Women                     | -0.2                      | 0.033                 | -0.1                                                                                    | 0.032                 | -0.1                                                                                                                | 30%                                                                                                                          |
| <b>Age group</b>          |                           |                       |                                                                                         |                       |                                                                                                                     |                                                                                                                              |
| 18-24                     | -10.7                     | 0.082                 | -10.4                                                                                   | 0.080                 | -0.2                                                                                                                | 2%                                                                                                                           |
| 25-34                     | -9.0                      | 0.062                 | -8.7                                                                                    | 0.060                 | -0.3                                                                                                                | 4%                                                                                                                           |
| 35-44                     | -5.8                      | 0.055                 | -5.6                                                                                    | 0.053                 | -0.1                                                                                                                | 2%                                                                                                                           |
| 45-54                     | -3.8                      | 0.052                 | -3.8                                                                                    | 0.050                 | 0.0                                                                                                                 | 1%                                                                                                                           |
| <b>55-64 (reference)</b>  |                           |                       |                                                                                         |                       |                                                                                                                     |                                                                                                                              |
| 65-74                     | 5.0                       | 0.053                 | 5.0                                                                                     | 0.051                 | 0.0                                                                                                                 | 0%                                                                                                                           |
| 75-84                     | 8.3                       | 0.062                 | 8.3                                                                                     | 0.060                 | 0.0                                                                                                                 | 0%                                                                                                                           |
| 85+                       | 8.7                       | 0.102                 | 8.7                                                                                     | 0.098                 | 0.0                                                                                                                 | 0%                                                                                                                           |
| <b>Ethnic Group</b>       |                           |                       |                                                                                         |                       |                                                                                                                     |                                                                                                                              |
| <b>White</b>              |                           |                       |                                                                                         |                       |                                                                                                                     |                                                                                                                              |
| British White (reference) |                           |                       |                                                                                         |                       |                                                                                                                     |                                                                                                                              |
| Irish                     | 0.0                       | 0.142                 | 1.1                                                                                     | 0.138                 | -1.0                                                                                                                | > +/-100%                                                                                                                    |
| AO White                  | -1.6                      | 0.097                 | -0.7                                                                                    | 0.095                 | -0.8                                                                                                                | 53%                                                                                                                          |
| <b>Mixed</b>              |                           |                       |                                                                                         |                       |                                                                                                                     |                                                                                                                              |
| White & Black Caribbean   | -0.1                      | 0.358                 | 0.8                                                                                     | 0.345                 | -0.9                                                                                                                | > +/-100%                                                                                                                    |
| White & Black African     | -0.1                      | 0.459                 | 1.2                                                                                     | 0.444                 | -1.3                                                                                                                | > +/-100%                                                                                                                    |
| White & Black Asian       | -2.5                      | 0.368                 | -1.4                                                                                    | 0.355                 | -1.1                                                                                                                | 45%                                                                                                                          |
| Any other Mixed           | -1.8                      | 0.411                 | -0.5                                                                                    | 0.397                 | -1.3                                                                                                                | 73%                                                                                                                          |
| <b>South-Asian</b>        |                           |                       |                                                                                         |                       |                                                                                                                     |                                                                                                                              |
| Indian                    | -7.1                      | 0.105                 | -3.9                                                                                    | 0.113                 | -3.2                                                                                                                | 45%                                                                                                                          |
| Pakistani                 | -9.5                      | 0.137                 | -5.0                                                                                    | 0.149                 | -4.5                                                                                                                | 48%                                                                                                                          |
| Bangladeshi               | -10.6                     | 0.239                 | -6.1                                                                                    | 0.247                 | -4.5                                                                                                                | 43%                                                                                                                          |
| Any other Asian           | -3.2                      | 0.201                 | -1.2                                                                                    | 0.197                 | -2.0                                                                                                                | 63%                                                                                                                          |
| <b>Black</b>              |                           |                       |                                                                                         |                       |                                                                                                                     |                                                                                                                              |
| Black Caribbean           | 0.0                       | 0.156                 | 2.1                                                                                     | 0.155                 | -2.0                                                                                                                | > +/-100%                                                                                                                    |
| Black African             | 2.1                       | 0.145                 | 3.6                                                                                     | 0.146                 | -1.5                                                                                                                | -72%                                                                                                                         |
| Any other Black           | 1.5                       | 0.402                 | 2.9                                                                                     | 0.389                 | -1.4                                                                                                                | -94%                                                                                                                         |
| <b>Chinese</b>            |                           |                       |                                                                                         |                       |                                                                                                                     |                                                                                                                              |
| Chinese                   | -5.0                      | 0.234                 | -4.1                                                                                    | 0.228                 | -1.0                                                                                                                | 19%                                                                                                                          |
| <b>Other ethnic group</b> |                           |                       |                                                                                         |                       |                                                                                                                     |                                                                                                                              |
| Other ethnic              | -2.3                      | 0.082                 | -0.8                                                                                    | 0.083                 | -1.5                                                                                                                | 65%                                                                                                                          |

|                                                           | Overall difference | Standard error | Difference attributable to different evaluation of care within the same practice | Standard error | Difference attributable to concentration of different patient groups in practices with different mean scores | Percentage of overall difference attributable to patient group concentration in practices with different mean scores* |
|-----------------------------------------------------------|--------------------|----------------|----------------------------------------------------------------------------------|----------------|--------------------------------------------------------------------------------------------------------------|-----------------------------------------------------------------------------------------------------------------------|
| <b>Deprivation group</b>                                  |                    |                |                                                                                  |                |                                                                                                              |                                                                                                                       |
| '1' (least deprived)<br>[reference]                       |                    |                |                                                                                  |                |                                                                                                              |                                                                                                                       |
| '2'                                                       | 0.5                | 0.050          | 0.4                                                                              | 0.054          | 0.1                                                                                                          | 21%                                                                                                                   |
| '3'                                                       | 0.3                | 0.051          | 0.6                                                                              | 0.058          | -0.3                                                                                                         | -92%                                                                                                                  |
| '4'                                                       | 0.2                | 0.052          | 1.1                                                                              | 0.063          | -0.9                                                                                                         | > +/-100%                                                                                                             |
| '5' (most deprived)                                       | 1.0                | 0.053          | 2.1                                                                              | 0.069          | -1.1                                                                                                         | > +/-100%                                                                                                             |
| <b>Self-rated health status</b>                           |                    |                |                                                                                  |                |                                                                                                              |                                                                                                                       |
| Excellent (reference)                                     |                    |                |                                                                                  |                |                                                                                                              |                                                                                                                       |
| Very good                                                 | -3.3               | 0.061          | -3.0                                                                             | 0.059          | -0.3                                                                                                         | 8%                                                                                                                    |
| Good                                                      | -5.5               | 0.061          | -5.0                                                                             | 0.059          | -0.5                                                                                                         | 9%                                                                                                                    |
| Fair                                                      | -6.6               | 0.067          | -5.9                                                                             | 0.065          | -0.6                                                                                                         | 10%                                                                                                                   |
| Poor                                                      | -7.2               | 0.088          | -6.5                                                                             | 0.085          | -0.7                                                                                                         | 9%                                                                                                                    |
| <b>Long-standing psychological or emotional condition</b> |                    |                |                                                                                  |                |                                                                                                              |                                                                                                                       |
| "No" (reference)                                          |                    |                |                                                                                  |                |                                                                                                              |                                                                                                                       |
| "Yes"                                                     | 2.2                | 0.073          | 2.2                                                                              | 0.071          | 0.0                                                                                                          | 2%                                                                                                                    |

\*Proportions >100% reflect situations where differences attributable to different evaluation of care within the same practice, and differences attributable to concentration of different patient groups in practices with different mean scores are opposite in direction.

**Online appendix 1, continued**

**Question 5a: Getting through on the phone**

|                           | <b>Overall difference</b> | <b>Standard error</b> | <b>Difference attributable to different evaluation of care within the same practice</b> | <b>Standard error</b> | <b>Difference attributable to concentration of different patient groups in practices with different mean scores</b> | <b>Percentage of overall difference attributable to patient group concentration in practices with different mean scores*</b> |
|---------------------------|---------------------------|-----------------------|-----------------------------------------------------------------------------------------|-----------------------|---------------------------------------------------------------------------------------------------------------------|------------------------------------------------------------------------------------------------------------------------------|
| <b>Gender</b>             |                           |                       |                                                                                         |                       |                                                                                                                     |                                                                                                                              |
| Men (reference)           |                           |                       |                                                                                         |                       |                                                                                                                     |                                                                                                                              |
| Women                     | -1.0                      | 0.047                 | -0.8                                                                                    | 0.042                 | -0.2                                                                                                                | 17%                                                                                                                          |
| <b>Age group</b>          |                           |                       |                                                                                         |                       |                                                                                                                     |                                                                                                                              |
| 18-24                     | -7.9                      | 0.121                 | -7.4                                                                                    | 0.108                 | -0.6                                                                                                                | 7%                                                                                                                           |
| 25-34                     | -5.8                      | 0.089                 | -5.4                                                                                    | 0.079                 | -0.4                                                                                                                | 8%                                                                                                                           |
| 35-44                     | -4.2                      | 0.078                 | -4.0                                                                                    | 0.070                 | -0.3                                                                                                                | 6%                                                                                                                           |
| 45-54                     | -3.1                      | 0.074                 | -3.0                                                                                    | 0.066                 | -0.1                                                                                                                | 4%                                                                                                                           |
| <b>55-64 (reference)</b>  |                           |                       |                                                                                         |                       |                                                                                                                     |                                                                                                                              |
| 65-74                     | 3.5                       | 0.076                 | 3.4                                                                                     | 0.068                 | 0.1                                                                                                                 | 4%                                                                                                                           |
| 75-84                     | 5.9                       | 0.088                 | 5.8                                                                                     | 0.079                 | 0.1                                                                                                                 | 2%                                                                                                                           |
| 85+                       | 6.7                       | 0.145                 | 6.5                                                                                     | 0.129                 | 0.2                                                                                                                 | 3%                                                                                                                           |
| <b>Ethnic Group</b>       |                           |                       |                                                                                         |                       |                                                                                                                     |                                                                                                                              |
| <b>White</b>              |                           |                       |                                                                                         |                       |                                                                                                                     |                                                                                                                              |
| British White (reference) |                           |                       |                                                                                         |                       |                                                                                                                     |                                                                                                                              |
| Irish                     | 0.7                       | 0.202                 | 1.3                                                                                     | 0.182                 | -0.6                                                                                                                | -89%                                                                                                                         |
| AO White                  | -0.5                      | 0.142                 | -0.4                                                                                    | 0.129                 | -0.1                                                                                                                | 20%                                                                                                                          |
| <b>Mixed</b>              |                           |                       |                                                                                         |                       |                                                                                                                     |                                                                                                                              |
| White & Black Caribbean   | 0.0                       | 0.509                 | 0.6                                                                                     | 0.454                 | -0.6                                                                                                                | > +/-100%                                                                                                                    |
| White & Black African     | 0.7                       | 0.657                 | 1.2                                                                                     | 0.587                 | -0.5                                                                                                                | -73%                                                                                                                         |
| White & Black Asian       | -0.6                      | 0.527                 | -0.3                                                                                    | 0.470                 | -0.3                                                                                                                | 50%                                                                                                                          |
| Any other Mixed           | -0.6                      | 0.590                 | -0.6                                                                                    | 0.527                 | 0.0                                                                                                                 | -6%                                                                                                                          |
| <b>South-Asian</b>        |                           |                       |                                                                                         |                       |                                                                                                                     |                                                                                                                              |
| Indian                    | -5.9                      | 0.148                 | -3.2                                                                                    | 0.149                 | -2.7                                                                                                                | 46%                                                                                                                          |
| Pakistani                 | -9.1                      | 0.193                 | -3.7                                                                                    | 0.196                 | -5.4                                                                                                                | 60%                                                                                                                          |
| Bangladeshi               | -8.8                      | 0.338                 | -4.8                                                                                    | 0.324                 | -4.0                                                                                                                | 45%                                                                                                                          |
| Any other Asian           | -0.9                      | 0.289                 | 0.3                                                                                     | 0.263                 | -1.2                                                                                                                | > +/-100%                                                                                                                    |
| <b>Black</b>              |                           |                       |                                                                                         |                       |                                                                                                                     |                                                                                                                              |
| Black Caribbean           | -2.1                      | 0.222                 | -0.5                                                                                    | 0.206                 | -1.7                                                                                                                | 78%                                                                                                                          |
| Black African             | 2.1                       | 0.210                 | 2.6                                                                                     | 0.195                 | -0.5                                                                                                                | -22%                                                                                                                         |
| Any other Black           | 0.7                       | 0.581                 | 1.5                                                                                     | 0.519                 | -0.8                                                                                                                | > +/-100%                                                                                                                    |
| <b>Chinese</b>            |                           |                       |                                                                                         |                       |                                                                                                                     |                                                                                                                              |
| Chinese                   | -3.0                      | 0.348                 | -3.3                                                                                    | 0.313                 | 0.3                                                                                                                 | -10%                                                                                                                         |
| <b>Other ethnic group</b> |                           |                       |                                                                                         |                       |                                                                                                                     |                                                                                                                              |
| Other ethnic              | -0.8                      | 0.119                 | -0.2                                                                                    | 0.111                 | -0.6                                                                                                                | 72%                                                                                                                          |

|                                                           | Overall difference | Standard error | Difference attributable to different evaluation of care within the same practice | Standard error | Difference attributable to concentration of different patient groups in practices with different mean scores | Percentage of overall difference attributable to patient group concentration in practices with different mean scores* |
|-----------------------------------------------------------|--------------------|----------------|----------------------------------------------------------------------------------|----------------|--------------------------------------------------------------------------------------------------------------|-----------------------------------------------------------------------------------------------------------------------|
| <b>Deprivation group</b>                                  |                    |                |                                                                                  |                |                                                                                                              |                                                                                                                       |
| '1' (least deprived)<br>[reference]                       |                    |                |                                                                                  |                |                                                                                                              |                                                                                                                       |
| '2'                                                       | 0.5                | 0.072          | 0.5                                                                              | 0.072          | 0.0                                                                                                          | 5%                                                                                                                    |
| '3'                                                       | 0.3                | 0.072          | 0.8                                                                              | 0.077          | -0.4                                                                                                         | > +/-100%                                                                                                             |
| '4'                                                       | -0.1               | 0.073          | 1.4                                                                              | 0.083          | -1.5                                                                                                         | > +/-100%                                                                                                             |
| '5' (most deprived)                                       | 1.0                | 0.076          | 2.5                                                                              | 0.093          | -1.5                                                                                                         | > +/-100%                                                                                                             |
| <b>Self-rated health status</b>                           |                    |                |                                                                                  |                |                                                                                                              |                                                                                                                       |
| Excellent (reference)                                     |                    |                |                                                                                  |                |                                                                                                              |                                                                                                                       |
| Very good                                                 | -5.1               | 0.091          | -4.3                                                                             | 0.081          | -0.8                                                                                                         | 15%                                                                                                                   |
| Good                                                      | -8.9               | 0.090          | -7.7                                                                             | 0.080          | -1.3                                                                                                         | 14%                                                                                                                   |
| Fair                                                      | -11.3              | 0.098          | -9.7                                                                             | 0.088          | -1.6                                                                                                         | 14%                                                                                                                   |
| Poor                                                      | -11.6              | 0.126          | -10.0                                                                            | 0.112          | -1.6                                                                                                         | 14%                                                                                                                   |
| <b>Long-standing psychological or emotional condition</b> |                    |                |                                                                                  |                |                                                                                                              |                                                                                                                       |
| "No" (reference)                                          |                    |                |                                                                                  |                |                                                                                                              |                                                                                                                       |
| "Yes"                                                     | 1.5                | 0.102          | 1.5                                                                              | 0.091          | 0.1                                                                                                          | 5%                                                                                                                    |

\*Proportions >100% reflect situations where differences attributable to different evaluation of care within the same practice, and differences attributable to concentration of different patient groups in practices with different mean scores are opposite in direction.

**Online appendix 1, continued**

**Question 7. Ability to get urgent appointment**

|                           | <b>Overall difference</b> | <i>Standard error</i> | <b>Difference attributable to different evaluation of care within the same practice</b> | <i>Standard error</i> | <b>Difference attributable to concentration of different patient groups in practices with different mean scores</b> | <b>Percentage of overall difference attributable to patient group concentration in practices with different mean scores*</b> |
|---------------------------|---------------------------|-----------------------|-----------------------------------------------------------------------------------------|-----------------------|---------------------------------------------------------------------------------------------------------------------|------------------------------------------------------------------------------------------------------------------------------|
| <b>Gender</b>             |                           |                       |                                                                                         |                       |                                                                                                                     |                                                                                                                              |
| Men (reference)           |                           |                       |                                                                                         |                       |                                                                                                                     |                                                                                                                              |
| Women                     | 0.7                       | 0.070                 | 0.8                                                                                     | 0.068                 | -0.1                                                                                                                | -13%                                                                                                                         |
| <b>Age group</b>          |                           |                       |                                                                                         |                       |                                                                                                                     |                                                                                                                              |
| 18-24                     | -8.4                      | 0.176                 | -7.6                                                                                    | 0.171                 | -0.8                                                                                                                | 9%                                                                                                                           |
| 25-34                     | -5.0                      | 0.129                 | -4.1                                                                                    | 0.125                 | -0.9                                                                                                                | 18%                                                                                                                          |
| 35-44                     | -3.0                      | 0.114                 | -2.5                                                                                    | 0.110                 | -0.5                                                                                                                | 18%                                                                                                                          |
| 45-54                     | -3.5                      | 0.110                 | -3.2                                                                                    | 0.107                 | -0.3                                                                                                                | 8%                                                                                                                           |
| <b>55-64 (reference)</b>  |                           |                       |                                                                                         |                       |                                                                                                                     |                                                                                                                              |
| 65-74                     | 3.9                       | 0.114                 | 3.7                                                                                     | 0.111                 | 0.2                                                                                                                 | 5%                                                                                                                           |
| 75-84                     | 6.0                       | 0.134                 | 5.6                                                                                     | 0.130                 | 0.3                                                                                                                 | 6%                                                                                                                           |
| 85+                       | 6.5                       | 0.227                 | 6.1                                                                                     | 0.220                 | 0.4                                                                                                                 | 6%                                                                                                                           |
| <b>Ethnic Group</b>       |                           |                       |                                                                                         |                       |                                                                                                                     |                                                                                                                              |
| <b>White</b>              |                           |                       |                                                                                         |                       |                                                                                                                     |                                                                                                                              |
| British White (reference) |                           |                       |                                                                                         |                       |                                                                                                                     |                                                                                                                              |
| Irish                     | -1.1                      | 0.298                 | 0.4                                                                                     | 0.290                 | -1.5                                                                                                                | > +/-100%                                                                                                                    |
| AO White                  | -3.2                      | 0.205                 | -2.0                                                                                    | 0.201                 | -1.2                                                                                                                | 38%                                                                                                                          |
| <b>Mixed</b>              |                           |                       |                                                                                         |                       |                                                                                                                     |                                                                                                                              |
| White & Black Caribbean   | -4.3                      | 0.729                 | -3.1                                                                                    | 0.706                 | -1.2                                                                                                                | 27%                                                                                                                          |
| White & Black African     | -4.5                      | 0.940                 | -2.4                                                                                    | 0.911                 | -2.1                                                                                                                | 46%                                                                                                                          |
| White & Black Asian       | -3.6                      | 0.763                 | -2.0                                                                                    | 0.740                 | -1.7                                                                                                                | 46%                                                                                                                          |
| Any other Mixed           | -4.3                      | 0.858                 | -2.4                                                                                    | 0.832                 | -1.9                                                                                                                | 44%                                                                                                                          |
| <b>South-Asian</b>        |                           |                       |                                                                                         |                       |                                                                                                                     |                                                                                                                              |
| Indian                    | -7.1                      | 0.215                 | -4.5                                                                                    | 0.232                 | -2.5                                                                                                                | 36%                                                                                                                          |
| Pakistani                 | -8.8                      | 0.280                 | -4.0                                                                                    | 0.305                 | -4.8                                                                                                                | 55%                                                                                                                          |
| Bangladeshi               | -11.4                     | 0.499                 | -7.9                                                                                    | 0.516                 | -3.5                                                                                                                | 31%                                                                                                                          |
| Any other Asian           | -1.8                      | 0.427                 | 0.2                                                                                     | 0.421                 | -1.9                                                                                                                | > +/-100%                                                                                                                    |
| <b>Black</b>              |                           |                       |                                                                                         |                       |                                                                                                                     |                                                                                                                              |
| Black Caribbean           | -4.8                      | 0.324                 | -1.7                                                                                    | 0.324                 | -3.2                                                                                                                | 66%                                                                                                                          |
| Black African             | -3.1                      | 0.303                 | -0.6                                                                                    | 0.304                 | -2.5                                                                                                                | 80%                                                                                                                          |
| Any other Black           | -4.7                      | 0.855                 | -2.7                                                                                    | 0.831                 | -2.0                                                                                                                | 42%                                                                                                                          |
| <b>Chinese</b>            |                           |                       |                                                                                         |                       |                                                                                                                     |                                                                                                                              |
| Chinese                   | -1.7                      | 0.535                 | -0.9                                                                                    | 0.522                 | -0.8                                                                                                                | 46%                                                                                                                          |
| <b>Other ethnic group</b> |                           |                       |                                                                                         |                       |                                                                                                                     |                                                                                                                              |
| Other ethnic              | -3.4                      | 0.173                 | -1.7                                                                                    | 0.173                 | -1.7                                                                                                                | 51%                                                                                                                          |

|                                                           | Overall difference | Standard error | Difference attributable to different evaluation of care within the same practice | Standard error | Difference attributable to concentration of different patient groups in practices with different mean scores | Percentage of overall difference attributable to patient group concentration in practices with different mean scores* |
|-----------------------------------------------------------|--------------------|----------------|----------------------------------------------------------------------------------|----------------|--------------------------------------------------------------------------------------------------------------|-----------------------------------------------------------------------------------------------------------------------|
| <b>Deprivation group</b>                                  |                    |                |                                                                                  |                |                                                                                                              |                                                                                                                       |
| '1' (least deprived)<br>[reference]                       |                    |                |                                                                                  |                |                                                                                                              |                                                                                                                       |
| '2'                                                       | -0.4               | 0.106          | -0.2                                                                             | 0.114          | -0.2                                                                                                         | 54%                                                                                                                   |
| '3'                                                       | -1.6               | 0.107          | -0.6                                                                             | 0.122          | -1.1                                                                                                         | 66%                                                                                                                   |
| '4'                                                       | -3.3               | 0.108          | -0.8                                                                             | 0.131          | -2.5                                                                                                         | 75%                                                                                                                   |
| '5' (most deprived)                                       | -3.7               | 0.112          | -0.6                                                                             | 0.144          | -3.1                                                                                                         | 83%                                                                                                                   |
| <b>Self-rated health status</b>                           |                    |                |                                                                                  |                |                                                                                                              |                                                                                                                       |
| Excellent (reference)                                     |                    |                |                                                                                  |                |                                                                                                              |                                                                                                                       |
| Very good                                                 | -2.6               | 0.138          | -2.2                                                                             | 0.134          | -0.4                                                                                                         | 16%                                                                                                                   |
| Good                                                      | -5.3               | 0.136          | -4.5                                                                             | 0.132          | -0.8                                                                                                         | 15%                                                                                                                   |
| Fair                                                      | -7.1               | 0.148          | -6.0                                                                             | 0.143          | -1.1                                                                                                         | 15%                                                                                                                   |
| Poor                                                      | -7.6               | 0.183          | -6.4                                                                             | 0.178          | -1.3                                                                                                         | 17%                                                                                                                   |
| <b>Long-standing psychological or emotional condition</b> |                    |                |                                                                                  |                |                                                                                                              |                                                                                                                       |
| "No" (reference)                                          |                    |                |                                                                                  |                |                                                                                                              |                                                                                                                       |
| "Yes"                                                     | 0.2                | 0.143          | 0.1                                                                              | 0.139          | 0.1                                                                                                          | 53%                                                                                                                   |

\*Proportions >100% reflect situations where differences attributable to different evaluation of care within the same practice, and differences attributable to concentration of different patient groups in practices with different mean scores are opposite in direction.

**Online appendix 1, continued**

**Question 10. Ability to book ahead**

|                           | <b>Overall difference</b> | <i>Standard error</i> | <b>Difference attributable to different evaluation of care within the same practice</b> | <i>Standard error</i> | <b>Difference attributable to concentration of different patient groups in practices with different mean scores</b> | <b>Percentage of overall difference attributable to patient group concentration in practices with different mean scores*</b> |
|---------------------------|---------------------------|-----------------------|-----------------------------------------------------------------------------------------|-----------------------|---------------------------------------------------------------------------------------------------------------------|------------------------------------------------------------------------------------------------------------------------------|
| <b>Gender</b>             |                           |                       |                                                                                         |                       |                                                                                                                     |                                                                                                                              |
| Men (reference)           |                           |                       |                                                                                         |                       |                                                                                                                     |                                                                                                                              |
| Women                     | -2.8                      | 0.090                 | -2.7                                                                                    | 0.085                 | -0.1                                                                                                                | 4%                                                                                                                           |
| <b>Age group</b>          |                           |                       |                                                                                         |                       |                                                                                                                     |                                                                                                                              |
| 18-24                     | -7.9                      | 0.238                 | -7.4                                                                                    | 0.225                 | -0.5                                                                                                                | 6%                                                                                                                           |
| 25-34                     | -4.7                      | 0.168                 | -4.3                                                                                    | 0.159                 | -0.4                                                                                                                | 8%                                                                                                                           |
| 35-44                     | -4.0                      | 0.147                 | -3.6                                                                                    | 0.139                 | -0.4                                                                                                                | 9%                                                                                                                           |
| 45-54                     | -3.5                      | 0.139                 | -3.2                                                                                    | 0.131                 | -0.3                                                                                                                | 9%                                                                                                                           |
| <b>55-64 (reference)</b>  |                           |                       |                                                                                         |                       |                                                                                                                     |                                                                                                                              |
| 65-74                     | 3.7                       | 0.141                 | 3.3                                                                                     | 0.133                 | 0.4                                                                                                                 | 11%                                                                                                                          |
| 75-84                     | 6.7                       | 0.167                 | 6.1                                                                                     | 0.158                 | 0.6                                                                                                                 | 9%                                                                                                                           |
| 85+                       | 8.0                       | 0.291                 | 7.3                                                                                     | 0.275                 | 0.7                                                                                                                 | 9%                                                                                                                           |
| <b>Ethnic Group</b>       |                           |                       |                                                                                         |                       |                                                                                                                     |                                                                                                                              |
| <b>White</b>              |                           |                       |                                                                                         |                       |                                                                                                                     |                                                                                                                              |
| British White (reference) |                           |                       |                                                                                         |                       |                                                                                                                     |                                                                                                                              |
| Irish                     | -0.8                      | 0.380                 | -0.8                                                                                    | 0.361                 | 0.0                                                                                                                 | 3%                                                                                                                           |
| AO White                  | -1.0                      | 0.263                 | -1.3                                                                                    | 0.251                 | 0.4                                                                                                                 | -38%                                                                                                                         |
| <b>Mixed</b>              |                           |                       |                                                                                         |                       |                                                                                                                     |                                                                                                                              |
| White & Black Caribbean   | 0.9                       | 0.961                 | -0.2                                                                                    | 0.907                 | 1.1                                                                                                                 | > +/-100%                                                                                                                    |
| White & Black African     | -1.0                      | 1.231                 | -1.4                                                                                    | 1.161                 | 0.4                                                                                                                 | -37%                                                                                                                         |
| White & Black Asian       | 0.2                       | 0.986                 | -0.3                                                                                    | 0.930                 | 0.6                                                                                                                 | > +/-100%                                                                                                                    |
| Any other Mixed           | -1.4                      | 1.082                 | -1.9                                                                                    | 1.021                 | 0.5                                                                                                                 | -34%                                                                                                                         |
| <b>South-Asian</b>        |                           |                       |                                                                                         |                       |                                                                                                                     |                                                                                                                              |
| Indian                    | -6.7                      | 0.278                 | -5.7                                                                                    | 0.294                 | -1.1                                                                                                                | 16%                                                                                                                          |
| Pakistani                 | -9.5                      | 0.371                 | -6.2                                                                                    | 0.395                 | -3.3                                                                                                                | 35%                                                                                                                          |
| Bangladeshi               | -11.6                     | 0.651                 | -10.8                                                                                   | 0.657                 | -0.8                                                                                                                | 7%                                                                                                                           |
| Any other Asian           | -2.6                      | 0.555                 | -2.7                                                                                    | 0.533                 | 0.1                                                                                                                 | -2%                                                                                                                          |
| <b>Black</b>              |                           |                       |                                                                                         |                       |                                                                                                                     |                                                                                                                              |
| Black Caribbean           | -2.2                      | 0.432                 | -1.5                                                                                    | 0.421                 | -0.7                                                                                                                | 34%                                                                                                                          |
| Black African             | -0.1                      | 0.397                 | -0.6                                                                                    | 0.388                 | 0.6                                                                                                                 | > +/-100%                                                                                                                    |
| Any other Black           | -1.7                      | 1.140                 | -1.9                                                                                    | 1.077                 | 0.3                                                                                                                 | -15%                                                                                                                         |
| <b>Chinese</b>            |                           |                       |                                                                                         |                       |                                                                                                                     |                                                                                                                              |
| Chinese                   | 1.7                       | 0.666                 | 0.2                                                                                     | 0.632                 | 1.6                                                                                                                 | 91%                                                                                                                          |
| <b>Other ethnic group</b> |                           |                       |                                                                                         |                       |                                                                                                                     |                                                                                                                              |
| Other ethnic              | -1.0                      | 0.222                 | -1.4                                                                                    | 0.217                 | 0.4                                                                                                                 | -41%                                                                                                                         |

|                                                           | Overall difference | Standard error | Difference attributable to different evaluation of care within the same practice | Standard error | Difference attributable to concentration of different patient groups in practices with different mean scores | Percentage of overall difference attributable to patient group concentration in practices with different mean scores* |
|-----------------------------------------------------------|--------------------|----------------|----------------------------------------------------------------------------------|----------------|--------------------------------------------------------------------------------------------------------------|-----------------------------------------------------------------------------------------------------------------------|
| <b>Deprivation group</b>                                  |                    |                |                                                                                  |                |                                                                                                              |                                                                                                                       |
| '1' (least deprived)<br>[reference]                       |                    |                |                                                                                  |                |                                                                                                              |                                                                                                                       |
| '2'                                                       | -1.0               | 0.133          | -0.5                                                                             | 0.141          | -0.5                                                                                                         | 48%                                                                                                                   |
| '3'                                                       | -1.9               | 0.135          | -0.7                                                                             | 0.152          | -1.2                                                                                                         | 63%                                                                                                                   |
| '4'                                                       | -3.8               | 0.138          | -1.1                                                                             | 0.164          | -2.6                                                                                                         | 70%                                                                                                                   |
| '5' (most deprived)                                       | -4.8               | 0.144          | -1.4                                                                             | 0.182          | -3.4                                                                                                         | 72%                                                                                                                   |
| <b>Self-rated health status</b>                           |                    |                |                                                                                  |                |                                                                                                              |                                                                                                                       |
| Excellent (reference)                                     |                    |                |                                                                                  |                |                                                                                                              |                                                                                                                       |
| Very good                                                 | -3.5               | 0.182          | -2.6                                                                             | 0.172          | -0.9                                                                                                         | 24%                                                                                                                   |
| Good                                                      | -7.0               | 0.179          | -5.5                                                                             | 0.169          | -1.5                                                                                                         | 21%                                                                                                                   |
| Fair                                                      | -9.7               | 0.193          | -7.7                                                                             | 0.182          | -1.9                                                                                                         | 20%                                                                                                                   |
| Poor                                                      | -10.5              | 0.238          | -8.5                                                                             | 0.225          | -2.0                                                                                                         | 19%                                                                                                                   |
| <b>Long-standing psychological or emotional condition</b> |                    |                |                                                                                  |                |                                                                                                              |                                                                                                                       |
| "No" (reference)                                          |                    |                |                                                                                  |                |                                                                                                              |                                                                                                                       |
| "Yes"                                                     | 1.9                | 0.178          | 1.9                                                                              | 0.168          | 0.0                                                                                                          | 1%                                                                                                                    |

\*Proportions >100% reflect situations where differences attributable to different evaluation of care within the same practice, and differences attributable to concentration of different patient groups in practices with different mean scores are opposite in direction.



**Online appendix 1, continued**

**Question 14. Evaluation of surgery waiting time**

|                           | <b>Overall difference</b> | <i>Standard error</i> | <b>Difference attributable to different evaluation of care within the same practice</b> | <i>Standard error</i> | <b>Difference attributable to concentration of different patient groups in practices with different mean scores</b> | <b>Percentage of overall difference attributable to patient group concentration in practices with different mean scores*</b> |
|---------------------------|---------------------------|-----------------------|-----------------------------------------------------------------------------------------|-----------------------|---------------------------------------------------------------------------------------------------------------------|------------------------------------------------------------------------------------------------------------------------------|
| <b>Gender</b>             |                           |                       |                                                                                         |                       |                                                                                                                     |                                                                                                                              |
| Men (reference)           |                           |                       |                                                                                         |                       |                                                                                                                     |                                                                                                                              |
| Women                     | -1.7                      | 0.047                 | -1.6                                                                                    | 0.045                 | 0.0                                                                                                                 | 2%                                                                                                                           |
| <b>Age group</b>          |                           |                       |                                                                                         |                       |                                                                                                                     |                                                                                                                              |
| 18-24                     | -12.3                     | 0.118                 | -12.1                                                                                   | 0.113                 | -0.3                                                                                                                | 2%                                                                                                                           |
| 25-34                     | -10.3                     | 0.088                 | -10.0                                                                                   | 0.085                 | -0.4                                                                                                                | 3%                                                                                                                           |
| 35-44                     | -8.1                      | 0.077                 | -7.9                                                                                    | 0.074                 | -0.2                                                                                                                | 2%                                                                                                                           |
| 45-54                     | -4.2                      | 0.074                 | -4.2                                                                                    | 0.071                 | -0.1                                                                                                                | 1%                                                                                                                           |
| <b>55-64 (reference)</b>  |                           |                       |                                                                                         |                       |                                                                                                                     |                                                                                                                              |
| 65-74                     | 4.0                       | 0.076                 | 3.9                                                                                     | 0.072                 | 0.1                                                                                                                 | 2%                                                                                                                           |
| 75-84                     | 6.3                       | 0.089                 | 6.3                                                                                     | 0.085                 | 0.1                                                                                                                 | 1%                                                                                                                           |
| 85+                       | 6.1                       | 0.150                 | 6.1                                                                                     | 0.143                 | 0.0                                                                                                                 | 1%                                                                                                                           |
| <b>Ethnic Group</b>       |                           |                       |                                                                                         |                       |                                                                                                                     |                                                                                                                              |
| <b>White</b>              |                           |                       |                                                                                         |                       |                                                                                                                     |                                                                                                                              |
| British White (reference) |                           |                       |                                                                                         |                       |                                                                                                                     |                                                                                                                              |
| Irish                     | 0.6                       | 0.202                 | 2.6                                                                                     | 0.195                 | -2.1                                                                                                                | > +/-100%                                                                                                                    |
| AO White                  | -2.7                      | 0.140                 | -1.1                                                                                    | 0.135                 | -1.6                                                                                                                | 61%                                                                                                                          |
| <b>Mixed</b>              |                           |                       |                                                                                         |                       |                                                                                                                     |                                                                                                                              |
| White & Black Caribbean   | -3.8                      | 0.505                 | -1.5                                                                                    | 0.483                 | -2.3                                                                                                                | 60%                                                                                                                          |
| White & Black African     | -3.0                      | 0.655                 | -0.2                                                                                    | 0.627                 | -2.8                                                                                                                | 93%                                                                                                                          |
| White & Black Asian       | -4.2                      | 0.522                 | -2.2                                                                                    | 0.499                 | -2.0                                                                                                                | 47%                                                                                                                          |
| Any other Mixed           | -5.2                      | 0.588                 | -2.6                                                                                    | 0.563                 | -2.6                                                                                                                | 49%                                                                                                                          |
| <b>South-Asian</b>        |                           |                       |                                                                                         |                       |                                                                                                                     |                                                                                                                              |
| Indian                    | -11.2                     | 0.149                 | -6.3                                                                                    | 0.159                 | -4.9                                                                                                                | 44%                                                                                                                          |
| Pakistani                 | -15.1                     | 0.193                 | -8.5                                                                                    | 0.209                 | -6.6                                                                                                                | 44%                                                                                                                          |
| Bangladeshi               | -19.9                     | 0.340                 | -13.7                                                                                   | 0.349                 | -6.2                                                                                                                | 31%                                                                                                                          |
| Any other Asian           | -9.2                      | 0.288                 | -4.9                                                                                    | 0.281                 | -4.3                                                                                                                | 47%                                                                                                                          |
| <b>Black</b>              |                           |                       |                                                                                         |                       |                                                                                                                     |                                                                                                                              |
| Black Caribbean           | -5.8                      | 0.221                 | -0.8                                                                                    | 0.219                 | -4.9                                                                                                                | 86%                                                                                                                          |
| Black African             | -4.5                      | 0.208                 | -0.4                                                                                    | 0.207                 | -4.1                                                                                                                | 91%                                                                                                                          |
| Any other Black           | -5.0                      | 0.581                 | -1.3                                                                                    | 0.557                 | -3.8                                                                                                                | 75%                                                                                                                          |
| <b>Chinese</b>            |                           |                       |                                                                                         |                       |                                                                                                                     |                                                                                                                              |
| Chinese                   | -8.5                      | 0.340                 | -6.6                                                                                    | 0.328                 | -1.8                                                                                                                | 22%                                                                                                                          |
| <b>Other ethnic group</b> |                           |                       |                                                                                         |                       |                                                                                                                     |                                                                                                                              |
| Other ethnic              | -5.4                      | 0.118                 | -2.5                                                                                    | 0.117                 | -2.9                                                                                                                | 54%                                                                                                                          |

|                                                           | Overall difference | Standard error | Difference attributable to different evaluation of care within the same practice | Standard error | Difference attributable to concentration of different patient groups in practices with different mean scores | Percentage of overall difference attributable to patient group concentration in practices with different mean scores* |
|-----------------------------------------------------------|--------------------|----------------|----------------------------------------------------------------------------------|----------------|--------------------------------------------------------------------------------------------------------------|-----------------------------------------------------------------------------------------------------------------------|
| <b>Deprivation group</b>                                  |                    |                |                                                                                  |                |                                                                                                              |                                                                                                                       |
| '1' (least deprived)<br>[reference]                       |                    |                |                                                                                  |                |                                                                                                              |                                                                                                                       |
| '2'                                                       | 0.0                | 0.071          | 0.1                                                                              | 0.076          | -0.2                                                                                                         | > +/-100%                                                                                                             |
| '3'                                                       | -0.5               | 0.072          | 0.1                                                                              | 0.082          | -0.6                                                                                                         | > +/-100%                                                                                                             |
| '4'                                                       | -1.4               | 0.073          | 0.2                                                                              | 0.088          | -1.5                                                                                                         | > +/-100%                                                                                                             |
| '5' (most deprived)                                       | -1.7               | 0.076          | 0.3                                                                              | 0.098          | -1.9                                                                                                         | > +/-100%                                                                                                             |
| <b>Self-rated health status</b>                           |                    |                |                                                                                  |                |                                                                                                              |                                                                                                                       |
| Excellent (reference)                                     |                    |                |                                                                                  |                |                                                                                                              |                                                                                                                       |
| Very good                                                 | -2.7               | 0.088          | -2.4                                                                             | 0.084          | -0.3                                                                                                         | 10%                                                                                                                   |
| Good                                                      | -5.4               | 0.087          | -5.0                                                                             | 0.083          | -0.5                                                                                                         | 9%                                                                                                                    |
| Fair                                                      | -8.0               | 0.096          | -7.4                                                                             | 0.092          | -0.7                                                                                                         | 8%                                                                                                                    |
| Poor                                                      | -10.5              | 0.126          | -9.7                                                                             | 0.121          | -0.8                                                                                                         | 7%                                                                                                                    |
| <b>Long-standing psychological or emotional condition</b> |                    |                |                                                                                  |                |                                                                                                              |                                                                                                                       |
| "No" (reference)                                          |                    |                |                                                                                  |                |                                                                                                              |                                                                                                                       |
| "Yes"                                                     | 0.1                | 0.104          | 0.2                                                                              | 0.099          | -0.1                                                                                                         | -79%                                                                                                                  |

\*Proportions >100% reflect situations where differences attributable to different evaluation of care within the same practice, and differences attributable to concentration of different patient groups in practices with different mean scores are opposite in direction.

**Online appendix 1, continued**

**Question 16. Seeing the doctor you prefer**

|                           | <b>Overall difference</b> | <b>Standard error</b> | <b>Difference attributable to different evaluation of care within the same practice</b> | <b>Standard error</b> | <b>Difference attributable to concentration of different patient groups in practices with different mean scores</b> | <b>Percentage of overall difference attributable to patient group concentration in practices with different mean scores*</b> |
|---------------------------|---------------------------|-----------------------|-----------------------------------------------------------------------------------------|-----------------------|---------------------------------------------------------------------------------------------------------------------|------------------------------------------------------------------------------------------------------------------------------|
| <b>Gender</b>             |                           |                       |                                                                                         |                       |                                                                                                                     |                                                                                                                              |
| Men (reference)           |                           |                       |                                                                                         |                       |                                                                                                                     |                                                                                                                              |
| Women                     | -2.6                      | 0.059                 | -2.1                                                                                    | 0.055                 | -0.6                                                                                                                | 22%                                                                                                                          |
| <b>Age group</b>          |                           |                       |                                                                                         |                       |                                                                                                                     |                                                                                                                              |
| 18-24                     | -15.3                     | 0.157                 | -15.3                                                                                   | 0.149                 | 0.1                                                                                                                 | 0%                                                                                                                           |
| 25-34                     | -13.7                     | 0.117                 | -13.5                                                                                   | 0.110                 | -0.2                                                                                                                | 1%                                                                                                                           |
| 35-44                     | -11.0                     | 0.099                 | -10.9                                                                                   | 0.094                 | 0.0                                                                                                                 | 0%                                                                                                                           |
| 45-54                     | -6.1                      | 0.092                 | -6.1                                                                                    | 0.087                 | 0.0                                                                                                                 | 0%                                                                                                                           |
| <b>55-64 (reference)</b>  |                           |                       |                                                                                         |                       |                                                                                                                     |                                                                                                                              |
| 65-74                     | 5.1                       | 0.090                 | 5.2                                                                                     | 0.085                 | 0.0                                                                                                                 | -1%                                                                                                                          |
| 75-84                     | 7.5                       | 0.104                 | 7.6                                                                                     | 0.098                 | -0.1                                                                                                                | -1%                                                                                                                          |
| 85+                       | 7.1                       | 0.171                 | 7.0                                                                                     | 0.161                 | 0.1                                                                                                                 | 2%                                                                                                                           |
| <b>Ethnic Group</b>       |                           |                       |                                                                                         |                       |                                                                                                                     |                                                                                                                              |
| <b>White</b>              |                           |                       |                                                                                         |                       |                                                                                                                     |                                                                                                                              |
| British White (reference) |                           |                       |                                                                                         |                       |                                                                                                                     |                                                                                                                              |
| Irish                     | -0.8                      | 0.251                 | -0.4                                                                                    | 0.238                 | -0.3                                                                                                                | 44%                                                                                                                          |
| AO White                  | -1.8                      | 0.175                 | -1.5                                                                                    | 0.167                 | -0.3                                                                                                                | 18%                                                                                                                          |
| <b>Mixed</b>              |                           |                       |                                                                                         |                       |                                                                                                                     |                                                                                                                              |
| White & Black Caribbean   | -0.9                      | 0.657                 | -0.9                                                                                    | 0.620                 | 0.1                                                                                                                 | -7%                                                                                                                          |
| White & Black African     | -3.5                      | 0.862                 | -3.2                                                                                    | 0.813                 | -0.4                                                                                                                | 11%                                                                                                                          |
| White & Black Asian       | -4.5                      | 0.679                 | -3.9                                                                                    | 0.640                 | -0.6                                                                                                                | 13%                                                                                                                          |
| Any other Mixed           | -4.5                      | 0.742                 | -4.2                                                                                    | 0.701                 | -0.3                                                                                                                | 6%                                                                                                                           |
| <b>South-Asian</b>        |                           |                       |                                                                                         |                       |                                                                                                                     |                                                                                                                              |
| Indian                    | -5.9                      | 0.186                 | -4.4                                                                                    | 0.196                 | -1.5                                                                                                                | 25%                                                                                                                          |
| Pakistani                 | -8.7                      | 0.248                 | -6.1                                                                                    | 0.264                 | -2.6                                                                                                                | 30%                                                                                                                          |
| Bangladeshi               | -10.0                     | 0.425                 | -8.1                                                                                    | 0.432                 | -1.9                                                                                                                | 19%                                                                                                                          |
| Any other Asian           | -7.6                      | 0.364                 | -6.5                                                                                    | 0.350                 | -1.1                                                                                                                | 14%                                                                                                                          |
| <b>Black</b>              |                           |                       |                                                                                         |                       |                                                                                                                     |                                                                                                                              |
| Black Caribbean           | -2.9                      | 0.277                 | -2.0                                                                                    | 0.271                 | -0.9                                                                                                                | 31%                                                                                                                          |
| Black African             | -9.1                      | 0.294                 | -8.3                                                                                    | 0.287                 | -0.8                                                                                                                | 9%                                                                                                                           |
| Any other Black           | -6.3                      | 0.737                 | -6.1                                                                                    | 0.697                 | -0.1                                                                                                                | 2%                                                                                                                           |
| <b>Chinese</b>            |                           |                       |                                                                                         |                       |                                                                                                                     |                                                                                                                              |
| Chinese                   | -8.0                      | 0.458                 | -8.5                                                                                    | 0.437                 | 0.5                                                                                                                 | -6%                                                                                                                          |
| <b>Other ethnic group</b> |                           |                       |                                                                                         |                       |                                                                                                                     |                                                                                                                              |
| Other ethnic              | -4.6                      | 0.151                 | -3.9                                                                                    | 0.148                 | -0.7                                                                                                                | 14%                                                                                                                          |

|                                                           | <b>Overall difference</b> | <i>Standard error</i> | <b>Difference attributable to different evaluation of care within the same practice</b> | <i>Standard error</i> | <b>Difference attributable to concentration of different patient groups in practices with different mean scores</b> | <b>Percentage of overall difference attributable to patient group concentration in practices with different mean scores*</b> |
|-----------------------------------------------------------|---------------------------|-----------------------|-----------------------------------------------------------------------------------------|-----------------------|---------------------------------------------------------------------------------------------------------------------|------------------------------------------------------------------------------------------------------------------------------|
| <b>Deprivation group</b>                                  |                           |                       |                                                                                         |                       |                                                                                                                     |                                                                                                                              |
| '1' (least deprived)<br>[reference]                       |                           |                       |                                                                                         |                       |                                                                                                                     |                                                                                                                              |
| '2'                                                       | 0.6                       | 0.087                 | 0.4                                                                                     | 0.092                 | 0.3                                                                                                                 | 41%                                                                                                                          |
| '3'                                                       | 0.4                       | 0.088                 | 0.2                                                                                     | 0.099                 | 0.2                                                                                                                 | 57%                                                                                                                          |
| '4'                                                       | -0.2                      | 0.091                 | 0.1                                                                                     | 0.107                 | -0.3                                                                                                                | > +/-100%                                                                                                                    |
| '5' (most deprived)                                       | -0.5                      | 0.095                 | -0.2                                                                                    | 0.120                 | -0.3                                                                                                                | 56%                                                                                                                          |
| <b>Self-rated health status</b>                           |                           |                       |                                                                                         |                       |                                                                                                                     |                                                                                                                              |
| Excellent (reference)                                     |                           |                       |                                                                                         |                       |                                                                                                                     |                                                                                                                              |
| Very good                                                 | -3.8                      | 0.120                 | -3.1                                                                                    | 0.113                 | -0.6                                                                                                                | 16%                                                                                                                          |
| Good                                                      | -6.2                      | 0.117                 | -5.0                                                                                    | 0.111                 | -1.2                                                                                                                | 19%                                                                                                                          |
| Fair                                                      | -7.2                      | 0.126                 | -5.6                                                                                    | 0.119                 | -1.6                                                                                                                | 22%                                                                                                                          |
| Poor                                                      | -6.8                      | 0.155                 | -5.1                                                                                    | 0.147                 | -1.6                                                                                                                | 24%                                                                                                                          |
| <b>Long-standing psychological or emotional condition</b> |                           |                       |                                                                                         |                       |                                                                                                                     |                                                                                                                              |
| "No" (reference)                                          |                           |                       |                                                                                         |                       |                                                                                                                     |                                                                                                                              |
| "Yes"                                                     | 4.4                       | 0.118                 | 4.7                                                                                     | 0.112                 | -0.3                                                                                                                | -7%                                                                                                                          |

\*Proportions >100% reflect situations where differences attributable to different evaluation of care within the same practice, and differences attributable to concentration of different patient groups in practices with different mean scores are opposite in direction.

**Online appendix 1, continued**

**Question 17. Satisfaction with opening hours**

|                           | <b>Overall difference</b> | <b>Standard error</b> | <b>Difference attributable to different evaluation of care within the same practice</b> | <b>Standard error</b> | <b>Difference attributable to concentration of different patient groups in practices with different mean scores</b> | <b>Percentage of overall difference attributable to patient group concentration in practices with different mean scores*</b> |
|---------------------------|---------------------------|-----------------------|-----------------------------------------------------------------------------------------|-----------------------|---------------------------------------------------------------------------------------------------------------------|------------------------------------------------------------------------------------------------------------------------------|
| <b>Gender</b>             |                           |                       |                                                                                         |                       |                                                                                                                     |                                                                                                                              |
| Men (reference)           |                           |                       |                                                                                         |                       |                                                                                                                     |                                                                                                                              |
| Women                     | 1.4                       | 0.036                 | 1.4                                                                                     | 0.035                 | 0.0                                                                                                                 | -3%                                                                                                                          |
| <b>Age group</b>          |                           |                       |                                                                                         |                       |                                                                                                                     |                                                                                                                              |
| 18-24                     | -8.9                      | 0.091                 | -8.8                                                                                    | 0.090                 | -0.1                                                                                                                | 1%                                                                                                                           |
| 25-34                     | -8.3                      | 0.068                 | -8.2                                                                                    | 0.067                 | -0.2                                                                                                                | 2%                                                                                                                           |
| 35-44                     | -6.0                      | 0.060                 | -6.0                                                                                    | 0.059                 | -0.1                                                                                                                | 1%                                                                                                                           |
| 45-54                     | -4.8                      | 0.057                 | -4.8                                                                                    | 0.056                 | 0.0                                                                                                                 | 0%                                                                                                                           |
| <b>55-64 (reference)</b>  |                           |                       |                                                                                         |                       |                                                                                                                     |                                                                                                                              |
| 65-74                     | 6.0                       | 0.058                 | 6.0                                                                                     | 0.057                 | 0.0                                                                                                                 | 0%                                                                                                                           |
| 75-84                     | 7.4                       | 0.068                 | 7.4                                                                                     | 0.067                 | 0.0                                                                                                                 | -1%                                                                                                                          |
| 85+                       | 5.8                       | 0.112                 | 5.8                                                                                     | 0.110                 | -0.1                                                                                                                | -1%                                                                                                                          |
| <b>Ethnic Group</b>       |                           |                       |                                                                                         |                       |                                                                                                                     |                                                                                                                              |
| <b>White</b>              |                           |                       |                                                                                         |                       |                                                                                                                     |                                                                                                                              |
| British White (reference) |                           |                       |                                                                                         |                       |                                                                                                                     |                                                                                                                              |
| Irish                     | -0.3                      | 0.155                 | 1.0                                                                                     | 0.153                 | -1.2                                                                                                                | > +/-100%                                                                                                                    |
| AO White                  | -2.4                      | 0.107                 | -1.4                                                                                    | 0.107                 | -1.0                                                                                                                | 42%                                                                                                                          |
| <b>Mixed</b>              |                           |                       |                                                                                         |                       |                                                                                                                     |                                                                                                                              |
| White & Black Caribbean   | -0.5                      | 0.392                 | 0.6                                                                                     | 0.384                 | -1.2                                                                                                                | > +/-100%                                                                                                                    |
| White & Black African     | 0.5                       | 0.501                 | 2.0                                                                                     | 0.491                 | -1.5                                                                                                                | > +/-100%                                                                                                                    |
| White & Black Asian       | -3.6                      | 0.403                 | -2.3                                                                                    | 0.395                 | -1.3                                                                                                                | 35%                                                                                                                          |
| Any other Mixed           | -2.3                      | 0.451                 | -0.8                                                                                    | 0.443                 | -1.6                                                                                                                | 67%                                                                                                                          |
| <b>South-Asian</b>        |                           |                       |                                                                                         |                       |                                                                                                                     |                                                                                                                              |
| Indian                    | -6.3                      | 0.114                 | -3.8                                                                                    | 0.125                 | -2.6                                                                                                                | 41%                                                                                                                          |
| Pakistani                 | -6.1                      | 0.149                 | -3.2                                                                                    | 0.164                 | -2.9                                                                                                                | 47%                                                                                                                          |
| Bangladeshi               | -4.6                      | 0.261                 | -2.2                                                                                    | 0.273                 | -2.4                                                                                                                | 51%                                                                                                                          |
| Any other Asian           | -1.3                      | 0.220                 | 0.6                                                                                     | 0.219                 | -1.9                                                                                                                | > +/-100%                                                                                                                    |
| <b>Black</b>              |                           |                       |                                                                                         |                       |                                                                                                                     |                                                                                                                              |
| Black Caribbean           | -0.9                      | 0.170                 | 1.4                                                                                     | 0.172                 | -2.3                                                                                                                | > +/-100%                                                                                                                    |
| Black African             | 1.5                       | 0.160                 | 3.4                                                                                     | 0.162                 | -1.9                                                                                                                | > +/-100%                                                                                                                    |
| Any other Black           | 1.8                       | 0.442                 | 3.4                                                                                     | 0.435                 | -1.6                                                                                                                | -89%                                                                                                                         |
| <b>Chinese</b>            |                           |                       |                                                                                         |                       |                                                                                                                     |                                                                                                                              |
| Chinese                   | -7.6                      | 0.260                 | -6.5                                                                                    | 0.257                 | -1.1                                                                                                                | 15%                                                                                                                          |
| <b>Other ethnic group</b> |                           |                       |                                                                                         |                       |                                                                                                                     |                                                                                                                              |
| Other ethnic              | -2.2                      | 0.091                 | -0.7                                                                                    | 0.092                 | -1.5                                                                                                                | 69%                                                                                                                          |

|                                                           | Overall difference | Standard error | Difference attributable to different evaluation of care within the same practice | Standard error | Difference attributable to concentration of different patient groups in practices with different mean scores | Percentage of overall difference attributable to patient group concentration in practices with different mean scores* |
|-----------------------------------------------------------|--------------------|----------------|----------------------------------------------------------------------------------|----------------|--------------------------------------------------------------------------------------------------------------|-----------------------------------------------------------------------------------------------------------------------|
| <b>Deprivation group</b>                                  |                    |                |                                                                                  |                |                                                                                                              |                                                                                                                       |
| '1' (least deprived)<br>[reference]                       |                    |                |                                                                                  |                |                                                                                                              |                                                                                                                       |
| '2'                                                       | 0.7                | 0.055          | 0.7                                                                              | 0.060          | 0.0                                                                                                          | 2%                                                                                                                    |
| '3'                                                       | 1.0                | 0.055          | 1.2                                                                              | 0.064          | -0.2                                                                                                         | -16%                                                                                                                  |
| '4'                                                       | 1.5                | 0.056          | 2.1                                                                              | 0.069          | -0.6                                                                                                         | -36%                                                                                                                  |
| '5' (most deprived)                                       | 3.2                | 0.058          | 3.6                                                                              | 0.075          | -0.4                                                                                                         | -11%                                                                                                                  |
| <b>Self-rated health status</b>                           |                    |                |                                                                                  |                |                                                                                                              |                                                                                                                       |
| Excellent (reference)                                     |                    |                |                                                                                  |                |                                                                                                              |                                                                                                                       |
| Very good                                                 | -3.9               | 0.068          | -3.7                                                                             | 0.066          | -0.2                                                                                                         | 5%                                                                                                                    |
| Good                                                      | -6.7               | 0.067          | -6.4                                                                             | 0.066          | -0.3                                                                                                         | 5%                                                                                                                    |
| Fair                                                      | -7.5               | 0.074          | -7.1                                                                             | 0.073          | -0.4                                                                                                         | 6%                                                                                                                    |
| Poor                                                      | -7.2               | 0.096          | -6.8                                                                             | 0.095          | -0.4                                                                                                         | 6%                                                                                                                    |
| <b>Long-standing psychological or emotional condition</b> |                    |                |                                                                                  |                |                                                                                                              |                                                                                                                       |
| "No" (reference)                                          |                    |                |                                                                                  |                |                                                                                                              |                                                                                                                       |
| "Yes"                                                     | 3.1                | 0.079          | 3.0                                                                              | 0.078          | 0.1                                                                                                          | 3%                                                                                                                    |

\*Proportions >100% reflect situations where differences attributable to different evaluation of care within the same practice, and differences attributable to concentration of different patient groups in practices with different mean scores are opposite in direction.

**Online appendix 1, continued**

**Question 20. Doctor communication**

|                           | <b>Overall difference</b> | <b>Standard error</b> | <b>Difference attributable to different evaluation of care within the same practice</b> | <b>Standard error</b> | <b>Difference attributable to concentration of different patient groups in practices with different mean scores</b> | <b>Percentage of overall difference attributable to patient group concentration in practices with different mean scores*</b> |
|---------------------------|---------------------------|-----------------------|-----------------------------------------------------------------------------------------|-----------------------|---------------------------------------------------------------------------------------------------------------------|------------------------------------------------------------------------------------------------------------------------------|
| <b>Gender</b>             |                           |                       |                                                                                         |                       |                                                                                                                     |                                                                                                                              |
| Men (reference)           |                           |                       |                                                                                         |                       |                                                                                                                     |                                                                                                                              |
| Women                     | 0.6                       | 0.032                 | 0.5                                                                                     | 0.031                 | 0.1                                                                                                                 | 21%                                                                                                                          |
| <b>Age group</b>          |                           |                       |                                                                                         |                       |                                                                                                                     |                                                                                                                              |
| 18-24                     | -9.4                      | 0.082                 | -9.2                                                                                    | 0.080                 | -0.2                                                                                                                | 2%                                                                                                                           |
| 25-34                     | -8.4                      | 0.061                 | -8.1                                                                                    | 0.060                 | -0.3                                                                                                                | 3%                                                                                                                           |
| 35-44                     | -5.0                      | 0.054                 | -4.9                                                                                    | 0.052                 | -0.1                                                                                                                | 2%                                                                                                                           |
| 45-54                     | -2.8                      | 0.050                 | -2.8                                                                                    | 0.049                 | 0.0                                                                                                                 | 1%                                                                                                                           |
| <b>55-64 (reference)</b>  |                           |                       |                                                                                         |                       |                                                                                                                     |                                                                                                                              |
| 65-74                     | 3.0                       | 0.052                 | 2.9                                                                                     | 0.050                 | 0.0                                                                                                                 | 1%                                                                                                                           |
| 75-84                     | 4.0                       | 0.062                 | 3.9                                                                                     | 0.060                 | 0.1                                                                                                                 | 2%                                                                                                                           |
| 85+                       | 3.4                       | 0.106                 | 3.2                                                                                     | 0.103                 | 0.2                                                                                                                 | 5%                                                                                                                           |
| <b>Ethnic Group</b>       |                           |                       |                                                                                         |                       |                                                                                                                     |                                                                                                                              |
| <b>White</b>              |                           |                       |                                                                                         |                       |                                                                                                                     |                                                                                                                              |
| British White (reference) |                           |                       |                                                                                         |                       |                                                                                                                     |                                                                                                                              |
| Irish                     | -0.2                      | 0.141                 | 0.6                                                                                     | 0.138                 | -0.8                                                                                                                | > +/-100%                                                                                                                    |
| AO White                  | -4.1                      | 0.096                 | -3.2                                                                                    | 0.094                 | -0.9                                                                                                                | 22%                                                                                                                          |
| <b>Mixed</b>              |                           |                       |                                                                                         |                       |                                                                                                                     |                                                                                                                              |
| White & Black Caribbean   | -1.9                      | 0.355                 | -0.8                                                                                    | 0.346                 | -1.1                                                                                                                | 56%                                                                                                                          |
| White & Black African     | -3.5                      | 0.447                 | -1.9                                                                                    | 0.435                 | -1.6                                                                                                                | 46%                                                                                                                          |
| White & Black Asian       | -3.4                      | 0.358                 | -2.2                                                                                    | 0.348                 | -1.1                                                                                                                | 33%                                                                                                                          |
| Any other Mixed           | -4.7                      | 0.405                 | -3.3                                                                                    | 0.394                 | -1.4                                                                                                                | 31%                                                                                                                          |
| <b>South-Asian</b>        |                           |                       |                                                                                         |                       |                                                                                                                     |                                                                                                                              |
| Indian                    | -6.1                      | 0.101                 | -3.2                                                                                    | 0.109                 | -3.0                                                                                                                | 48%                                                                                                                          |
| Pakistani                 | -7.2                      | 0.132                 | -3.8                                                                                    | 0.145                 | -3.4                                                                                                                | 48%                                                                                                                          |
| Bangladeshi               | -8.6                      | 0.233                 | -5.3                                                                                    | 0.242                 | -3.4                                                                                                                | 39%                                                                                                                          |
| Any other Asian           | -4.3                      | 0.194                 | -2.1                                                                                    | 0.192                 | -2.2                                                                                                                | 51%                                                                                                                          |
| <b>Black</b>              |                           |                       |                                                                                         |                       |                                                                                                                     |                                                                                                                              |
| Black Caribbean           | -2.7                      | 0.155                 | -0.5                                                                                    | 0.156                 | -2.2                                                                                                                | 82%                                                                                                                          |
| Black African             | -2.6                      | 0.143                 | -0.2                                                                                    | 0.144                 | -2.4                                                                                                                | 94%                                                                                                                          |
| Any other Black           | -2.0                      | 0.405                 | -0.2                                                                                    | 0.394                 | -1.8                                                                                                                | 89%                                                                                                                          |
| <b>Chinese</b>            |                           |                       |                                                                                         |                       |                                                                                                                     |                                                                                                                              |
| Chinese                   | -8.3                      | 0.230                 | -7.2                                                                                    | 0.225                 | -1.1                                                                                                                | 14%                                                                                                                          |
| <b>Other ethnic group</b> |                           |                       |                                                                                         |                       |                                                                                                                     |                                                                                                                              |
| Other ethnic              | -4.7                      | 0.081                 | -3.2                                                                                    | 0.081                 | -1.5                                                                                                                | 32%                                                                                                                          |

|                                                           | Overall difference | Standard error | Difference attributable to different evaluation of care within the same practice | Standard error | Difference attributable to concentration of different patient groups in practices with different mean scores | Percentage of overall difference attributable to patient group concentration in practices with different mean scores* |
|-----------------------------------------------------------|--------------------|----------------|----------------------------------------------------------------------------------|----------------|--------------------------------------------------------------------------------------------------------------|-----------------------------------------------------------------------------------------------------------------------|
| <b>Deprivation group</b>                                  |                    |                |                                                                                  |                |                                                                                                              |                                                                                                                       |
| '1' (least deprived)<br>[reference]                       |                    |                |                                                                                  |                |                                                                                                              |                                                                                                                       |
| '2'                                                       | 0.0                | 0.050          | 0.1                                                                              | 0.054          | -0.2                                                                                                         | > +/-100%                                                                                                             |
| '3'                                                       | -0.5               | 0.050          | 0.1                                                                              | 0.058          | -0.6                                                                                                         | > +/-100%                                                                                                             |
| '4'                                                       | -1.2               | 0.051          | 0.3                                                                              | 0.062          | -1.4                                                                                                         | > +/-100%                                                                                                             |
| '5' (most deprived)                                       | -0.9               | 0.052          | 0.6                                                                              | 0.068          | -1.6                                                                                                         | > +/-100%                                                                                                             |
| <b>Self-rated health status</b>                           |                    |                |                                                                                  |                |                                                                                                              |                                                                                                                       |
| Excellent (reference)                                     |                    |                |                                                                                  |                |                                                                                                              |                                                                                                                       |
| Very good                                                 | -4.0               | 0.062          | -3.8                                                                             | 0.060          | -0.2                                                                                                         | 5%                                                                                                                    |
| Good                                                      | -7.6               | 0.061          | -7.2                                                                             | 0.060          | -0.4                                                                                                         | 6%                                                                                                                    |
| Fair                                                      | -9.4               | 0.067          | -8.8                                                                             | 0.065          | -0.6                                                                                                         | 7%                                                                                                                    |
| Poor                                                      | -10.0              | 0.086          | -9.3                                                                             | 0.084          | -0.7                                                                                                         | 7%                                                                                                                    |
| <b>Long-standing psychological or emotional condition</b> |                    |                |                                                                                  |                |                                                                                                              |                                                                                                                       |
| "No" (reference)                                          |                    |                |                                                                                  |                |                                                                                                              |                                                                                                                       |
| "Yes"                                                     | 2.0                | 0.070          | 1.7                                                                              | 0.068          | 0.3                                                                                                          | 14%                                                                                                                   |

\*Proportions >100% reflect situations where differences attributable to different evaluation of care within the same practice, and differences attributable to concentration of different patient groups in practices with different mean scores are opposite in direction.



**Online appendix 1, continued**

**Question 21. Confidence and trust in doctor**

|                           | <b>Overall difference</b> | <b>Standard error</b> | <b>Difference attributable to different evaluation of care within the same practice</b> | <b>Standard error</b> | <b>Difference attributable to concentration of different patient groups in practices with different mean scores</b> | <b>Percentage of overall difference attributable to patient group concentration in practices with different mean scores*</b> |
|---------------------------|---------------------------|-----------------------|-----------------------------------------------------------------------------------------|-----------------------|---------------------------------------------------------------------------------------------------------------------|------------------------------------------------------------------------------------------------------------------------------|
| <b>Gender</b>             |                           |                       |                                                                                         |                       |                                                                                                                     |                                                                                                                              |
| Men (reference)           |                           |                       |                                                                                         |                       |                                                                                                                     |                                                                                                                              |
| Women                     | -0.7                      | 0.041                 | -0.8                                                                                    | 0.040                 | 0.1                                                                                                                 | -16%                                                                                                                         |
| <b>Age group</b>          |                           |                       |                                                                                         |                       |                                                                                                                     |                                                                                                                              |
| 18-24                     | -10.6                     | 0.104                 | -10.5                                                                                   | 0.102                 | -0.2                                                                                                                | 1%                                                                                                                           |
| 25-34                     | -9.8                      | 0.078                 | -9.5                                                                                    | 0.077                 | -0.3                                                                                                                | 3%                                                                                                                           |
| 35-44                     | -5.0                      | 0.068                 | -4.9                                                                                    | 0.067                 | -0.1                                                                                                                | 2%                                                                                                                           |
| 45-54                     | -2.8                      | 0.065                 | -2.8                                                                                    | 0.063                 | 0.0                                                                                                                 | 0%                                                                                                                           |
| <b>55-64 (reference)</b>  |                           |                       |                                                                                         |                       |                                                                                                                     |                                                                                                                              |
| 65-74                     | 3.5                       | 0.066                 | 3.5                                                                                     | 0.065                 | 0.0                                                                                                                 | 0%                                                                                                                           |
| 75-84                     | 5.1                       | 0.078                 | 5.1                                                                                     | 0.076                 | 0.0                                                                                                                 | 1%                                                                                                                           |
| 85+                       | 4.9                       | 0.129                 | 4.7                                                                                     | 0.126                 | 0.1                                                                                                                 | 3%                                                                                                                           |
| <b>Ethnic Group</b>       |                           |                       |                                                                                         |                       |                                                                                                                     |                                                                                                                              |
| <b>White</b>              |                           |                       |                                                                                         |                       |                                                                                                                     |                                                                                                                              |
| British White (reference) |                           |                       |                                                                                         |                       |                                                                                                                     |                                                                                                                              |
| Irish                     | -0.2                      | 0.177                 | 0.5                                                                                     | 0.175                 | -0.7                                                                                                                | > +/-100%                                                                                                                    |
| AO White                  | -6.1                      | 0.123                 | -5.3                                                                                    | 0.122                 | -0.8                                                                                                                | 13%                                                                                                                          |
| <b>Mixed</b>              |                           |                       |                                                                                         |                       |                                                                                                                     |                                                                                                                              |
| White & Black Caribbean   | -2.7                      | 0.448                 | -1.7                                                                                    | 0.440                 | -1.1                                                                                                                | 39%                                                                                                                          |
| White & Black African     | -4.4                      | 0.580                 | -2.9                                                                                    | 0.570                 | -1.5                                                                                                                | 34%                                                                                                                          |
| White & Black Asian       | -3.2                      | 0.462                 | -2.2                                                                                    | 0.454                 | -0.9                                                                                                                | 30%                                                                                                                          |
| Any other Mixed           | -5.1                      | 0.522                 | -3.7                                                                                    | 0.512                 | -1.3                                                                                                                | 26%                                                                                                                          |
| <b>South-Asian</b>        |                           |                       |                                                                                         |                       |                                                                                                                     |                                                                                                                              |
| Indian                    | -5.3                      | 0.132                 | -2.5                                                                                    | 0.144                 | -2.7                                                                                                                | 52%                                                                                                                          |
| Pakistani                 | -5.2                      | 0.173                 | -2.2                                                                                    | 0.190                 | -3.0                                                                                                                | 57%                                                                                                                          |
| Bangladeshi               | -6.4                      | 0.304                 | -3.2                                                                                    | 0.318                 | -3.2                                                                                                                | 50%                                                                                                                          |
| Any other Asian           | -3.8                      | 0.256                 | -1.8                                                                                    | 0.255                 | -2.0                                                                                                                | 52%                                                                                                                          |
| <b>Black</b>              |                           |                       |                                                                                         |                       |                                                                                                                     |                                                                                                                              |
| Black Caribbean           | -3.4                      | 0.196                 | -1.2                                                                                    | 0.199                 | -2.1                                                                                                                | 64%                                                                                                                          |
| Black African             | -3.2                      | 0.185                 | -0.8                                                                                    | 0.188                 | -2.5                                                                                                                | 77%                                                                                                                          |
| Any other Black           | -3.2                      | 0.512                 | -1.5                                                                                    | 0.504                 | -1.6                                                                                                                | 52%                                                                                                                          |
| <b>Chinese</b>            |                           |                       |                                                                                         |                       |                                                                                                                     |                                                                                                                              |
| Chinese                   | -10.0                     | 0.302                 | -8.9                                                                                    | 0.299                 | -1.1                                                                                                                | 11%                                                                                                                          |
| <b>Other ethnic group</b> |                           |                       |                                                                                         |                       |                                                                                                                     |                                                                                                                              |
| Other ethnic              | -5.9                      | 0.105                 | -4.5                                                                                    | 0.106                 | -1.4                                                                                                                | 24%                                                                                                                          |

|                                                           | Overall difference | Standard error | Difference attributable to different evaluation of care within the same practice | Standard error | Difference attributable to concentration of different patient groups in practices with different mean scores | Percentage of overall difference attributable to patient group concentration in practices with different mean scores* |
|-----------------------------------------------------------|--------------------|----------------|----------------------------------------------------------------------------------|----------------|--------------------------------------------------------------------------------------------------------------|-----------------------------------------------------------------------------------------------------------------------|
| <b>Deprivation group</b>                                  |                    |                |                                                                                  |                |                                                                                                              |                                                                                                                       |
| '1' (least deprived)<br>[reference]                       |                    |                |                                                                                  |                |                                                                                                              |                                                                                                                       |
| '2'                                                       | -0.3               | 0.063          | -0.1                                                                             | 0.068          | -0.3                                                                                                         | 82%                                                                                                                   |
| '3'                                                       | -1.0               | 0.063          | -0.2                                                                             | 0.073          | -0.8                                                                                                         | 83%                                                                                                                   |
| '4'                                                       | -1.8               | 0.064          | 0.0                                                                              | 0.078          | -1.7                                                                                                         | 99%                                                                                                                   |
| '5' (most deprived)                                       | -1.7               | 0.066          | 0.4                                                                              | 0.086          | -2.1                                                                                                         | > +/-100%                                                                                                             |
| <b>Self-rated health status</b>                           |                    |                |                                                                                  |                |                                                                                                              |                                                                                                                       |
| Excellent (reference)                                     |                    |                |                                                                                  |                |                                                                                                              |                                                                                                                       |
| Very good                                                 | -4.2               | 0.076          | -4.0                                                                             | 0.075          | -0.2                                                                                                         | 5%                                                                                                                    |
| Good                                                      | -8.3               | 0.076          | -7.8                                                                             | 0.075          | -0.5                                                                                                         | 5%                                                                                                                    |
| Fair                                                      | -10.8              | 0.084          | -10.2                                                                            | 0.083          | -0.6                                                                                                         | 6%                                                                                                                    |
| Poor                                                      | -12.0              | 0.110          | -11.3                                                                            | 0.108          | -0.7                                                                                                         | 6%                                                                                                                    |
| <b>Long-standing psychological or emotional condition</b> |                    |                |                                                                                  |                |                                                                                                              |                                                                                                                       |
| "No" (reference)                                          |                    |                |                                                                                  |                |                                                                                                              |                                                                                                                       |
| "Yes"                                                     | 1.7                | 0.091          | 1.4                                                                              | 0.089          | 0.3                                                                                                          | 17%                                                                                                                   |

\*Proportions >100% reflect situations where differences attributable to different evaluation of care within the same practice, and differences attributable to concentration of different patient groups in practices with different mean scores are opposite in direction.

**Online appendix 1, continued**

**Question 24. Nurse communication**

|                           | <b>Overall difference</b> | <b>Standard error</b> | <b>Difference attributable to different evaluation of care within the same practice</b> | <b>Standard error</b> | <b>Difference attributable to concentration of different patient groups in practices with different mean scores</b> | <b>Percentage of overall difference attributable to patient group concentration in practices with different mean scores*</b> |
|---------------------------|---------------------------|-----------------------|-----------------------------------------------------------------------------------------|-----------------------|---------------------------------------------------------------------------------------------------------------------|------------------------------------------------------------------------------------------------------------------------------|
| <b>Gender</b>             |                           |                       |                                                                                         |                       |                                                                                                                     |                                                                                                                              |
| Men (reference)           |                           |                       |                                                                                         |                       |                                                                                                                     |                                                                                                                              |
| Women                     | 0.2                       | 0.039                 | 0.2                                                                                     | 0.039                 | 0.0                                                                                                                 | 4%                                                                                                                           |
| <b>Age group</b>          |                           |                       |                                                                                         |                       |                                                                                                                     |                                                                                                                              |
| 18-24                     | -5.2                      | 0.113                 | -5.0                                                                                    | 0.111                 | -0.2                                                                                                                | 3%                                                                                                                           |
| 25-34                     | -4.2                      | 0.077                 | -3.9                                                                                    | 0.076                 | -0.3                                                                                                                | 7%                                                                                                                           |
| 35-44                     | -2.4                      | 0.068                 | -2.3                                                                                    | 0.067                 | -0.1                                                                                                                | 6%                                                                                                                           |
| 45-54                     | -1.7                      | 0.063                 | -1.6                                                                                    | 0.061                 | 0.0                                                                                                                 | 3%                                                                                                                           |
| <b>55-64 (reference)</b>  |                           |                       |                                                                                         |                       |                                                                                                                     |                                                                                                                              |
| 65-74                     | 1.9                       | 0.058                 | 1.9                                                                                     | 0.057                 | 0.0                                                                                                                 | 0%                                                                                                                           |
| 75-84                     | 2.8                       | 0.068                 | 2.9                                                                                     | 0.067                 | 0.0                                                                                                                 | -1%                                                                                                                          |
| 85+                       | 2.7                       | 0.117                 | 2.7                                                                                     | 0.115                 | -0.1                                                                                                                | -2%                                                                                                                          |
| <b>Ethnic Group</b>       |                           |                       |                                                                                         |                       |                                                                                                                     |                                                                                                                              |
| <b>White</b>              |                           |                       |                                                                                         |                       |                                                                                                                     |                                                                                                                              |
| British White (reference) |                           |                       |                                                                                         |                       |                                                                                                                     |                                                                                                                              |
| Irish                     | -0.5                      | 0.168                 | 0.4                                                                                     | 0.166                 | -0.9                                                                                                                | > +/-100%                                                                                                                    |
| AO White                  | -3.2                      | 0.118                 | -2.4                                                                                    | 0.117                 | -0.8                                                                                                                | 25%                                                                                                                          |
| <b>Mixed</b>              |                           |                       |                                                                                         |                       |                                                                                                                     |                                                                                                                              |
| White & Black Caribbean   | -1.7                      | 0.446                 | -0.8                                                                                    | 0.439                 | -0.9                                                                                                                | 51%                                                                                                                          |
| White & Black African     | -4.0                      | 0.570                 | -2.5                                                                                    | 0.561                 | -1.5                                                                                                                | 38%                                                                                                                          |
| White & Black Asian       | -4.2                      | 0.459                 | -3.3                                                                                    | 0.452                 | -0.9                                                                                                                | 22%                                                                                                                          |
| Any other Mixed           | -4.1                      | 0.507                 | -2.6                                                                                    | 0.499                 | -1.5                                                                                                                | 37%                                                                                                                          |
| <b>South-Asian</b>        |                           |                       |                                                                                         |                       |                                                                                                                     |                                                                                                                              |
| Indian                    | -7.2                      | 0.123                 | -5.1                                                                                    | 0.134                 | -2.1                                                                                                                | 29%                                                                                                                          |
| Pakistani                 | -7.8                      | 0.165                 | -5.9                                                                                    | 0.179                 | -1.9                                                                                                                | 24%                                                                                                                          |
| Bangladeshi               | -9.6                      | 0.309                 | -7.3                                                                                    | 0.319                 | -2.3                                                                                                                | 24%                                                                                                                          |
| Any other Asian           | -6.2                      | 0.244                 | -4.3                                                                                    | 0.244                 | -1.9                                                                                                                | 30%                                                                                                                          |
| <b>Black</b>              |                           |                       |                                                                                         |                       |                                                                                                                     |                                                                                                                              |
| Black Caribbean           | -3.4                      | 0.192                 | -1.4                                                                                    | 0.195                 | -2.0                                                                                                                | 60%                                                                                                                          |
| Black African             | -4.0                      | 0.181                 | -1.8                                                                                    | 0.184                 | -2.2                                                                                                                | 55%                                                                                                                          |
| Any other Black           | -3.6                      | 0.492                 | -1.9                                                                                    | 0.485                 | -1.7                                                                                                                | 47%                                                                                                                          |
| <b>Chinese</b>            |                           |                       |                                                                                         |                       |                                                                                                                     |                                                                                                                              |
| Chinese                   | -9.4                      | 0.314                 | -8.3                                                                                    | 0.311                 | -1.2                                                                                                                | 12%                                                                                                                          |
| <b>Other ethnic group</b> |                           |                       |                                                                                         |                       |                                                                                                                     |                                                                                                                              |
| Other ethnic              | -4.7                      | 0.101                 | -3.3                                                                                    | 0.102                 | -1.4                                                                                                                | 29%                                                                                                                          |

|                                                           | Overall difference | Standard error | Difference attributable to different evaluation of care within the same practice | Standard error | Difference attributable to concentration of different patient groups in practices with different mean scores | Percentage of overall difference attributable to patient group concentration in practices with different mean scores* |
|-----------------------------------------------------------|--------------------|----------------|----------------------------------------------------------------------------------|----------------|--------------------------------------------------------------------------------------------------------------|-----------------------------------------------------------------------------------------------------------------------|
| <b>Deprivation group</b>                                  |                    |                |                                                                                  |                |                                                                                                              |                                                                                                                       |
| '1' (least deprived)<br>[reference]                       |                    |                |                                                                                  |                |                                                                                                              |                                                                                                                       |
| '2'                                                       | 0.3                | 0.060          | 0.2                                                                              | 0.064          | 0.1                                                                                                          | 43%                                                                                                                   |
| '3'                                                       | 0.2                | 0.060          | 0.3                                                                              | 0.068          | -0.1                                                                                                         | -25%                                                                                                                  |
| '4'                                                       | 0.0                | 0.061          | 0.5                                                                              | 0.072          | -0.5                                                                                                         | > +/-100%                                                                                                             |
| '5' (most deprived)                                       | 0.6                | 0.062          | 1.0                                                                              | 0.077          | -0.5                                                                                                         | -81%                                                                                                                  |
| <b>Self-rated health status</b>                           |                    |                |                                                                                  |                |                                                                                                              |                                                                                                                       |
| Excellent (reference)                                     |                    |                |                                                                                  |                |                                                                                                              |                                                                                                                       |
| Very good                                                 | -3.4               | 0.083          | -3.3                                                                             | 0.082          | -0.1                                                                                                         | 2%                                                                                                                    |
| Good                                                      | -6.5               | 0.081          | -6.4                                                                             | 0.080          | -0.2                                                                                                         | 2%                                                                                                                    |
| Fair                                                      | -7.7               | 0.086          | -7.5                                                                             | 0.084          | -0.2                                                                                                         | 3%                                                                                                                    |
| Poor                                                      | -7.7               | 0.103          | -7.5                                                                             | 0.102          | -0.2                                                                                                         | 3%                                                                                                                    |
| <b>Long-standing psychological or emotional condition</b> |                    |                |                                                                                  |                |                                                                                                              |                                                                                                                       |
| "No" (reference)                                          |                    |                |                                                                                  |                |                                                                                                              |                                                                                                                       |
| "Yes"                                                     | 0.4                | 0.082          | 0.4                                                                              | 0.081          | 0.0                                                                                                          | -2%                                                                                                                   |

\*Proportions >100% reflect situations where differences attributable to different evaluation of care within the same practice, and differences attributable to concentration of different patient groups in practices with different mean scores are opposite in direction.

**Online appendix 1, continued**

**Question 25. Overall care satisfaction**

|                           | <b>Overall difference</b> | <b>Standard error</b> | <b>Difference attributable to different evaluation of care within the same practice</b> | <b>Standard error</b> | <b>Difference attributable to concentration of different patient groups in practices with different mean scores</b> | <b>Percentage of overall difference attributable to patient group concentration in practices with different mean scores*</b> |
|---------------------------|---------------------------|-----------------------|-----------------------------------------------------------------------------------------|-----------------------|---------------------------------------------------------------------------------------------------------------------|------------------------------------------------------------------------------------------------------------------------------|
| <b>Gender</b>             |                           |                       |                                                                                         |                       |                                                                                                                     |                                                                                                                              |
| Men (reference)           |                           |                       |                                                                                         |                       |                                                                                                                     |                                                                                                                              |
| Women                     | 0.2                       | 0.029                 | 0.2                                                                                     | 0.028                 | 0.0                                                                                                                 | 19%                                                                                                                          |
| <b>Age group</b>          |                           |                       |                                                                                         |                       |                                                                                                                     |                                                                                                                              |
| 18-24                     | -10.2                     | 0.073                 | -10.0                                                                                   | 0.071                 | -0.2                                                                                                                | 2%                                                                                                                           |
| 25-34                     | -9.1                      | 0.055                 | -8.8                                                                                    | 0.054                 | -0.3                                                                                                                | 4%                                                                                                                           |
| 35-44                     | -5.5                      | 0.048                 | -5.4                                                                                    | 0.047                 | -0.1                                                                                                                | 2%                                                                                                                           |
| 45-54                     | -3.4                      | 0.046                 | -3.4                                                                                    | 0.045                 | 0.0                                                                                                                 | 1%                                                                                                                           |
| <b>55-64 (reference)</b>  |                           |                       |                                                                                         |                       |                                                                                                                     |                                                                                                                              |
| 65-74                     | 3.9                       | 0.047                 | 3.9                                                                                     | 0.046                 | 0.0                                                                                                                 | 0%                                                                                                                           |
| 75-84                     | 5.4                       | 0.055                 | 5.3                                                                                     | 0.054                 | 0.0                                                                                                                 | 0%                                                                                                                           |
| 85+                       | 4.5                       | 0.091                 | 4.4                                                                                     | 0.088                 | 0.1                                                                                                                 | 2%                                                                                                                           |
| <b>Ethnic Group</b>       |                           |                       |                                                                                         |                       |                                                                                                                     |                                                                                                                              |
| <b>White</b>              |                           |                       |                                                                                         |                       |                                                                                                                     |                                                                                                                              |
| British White (reference) |                           |                       |                                                                                         |                       |                                                                                                                     |                                                                                                                              |
| Irish                     | -0.7                      | 0.126                 | 0.4                                                                                     | 0.123                 | -1.1                                                                                                                | > +/-100%                                                                                                                    |
| AO White                  | -4.8                      | 0.086                 | -3.7                                                                                    | 0.085                 | -1.1                                                                                                                | 23%                                                                                                                          |
| <b>Mixed</b>              |                           |                       |                                                                                         |                       |                                                                                                                     |                                                                                                                              |
| White & Black Caribbean   | -2.0                      | 0.315                 | -0.7                                                                                    | 0.307                 | -1.3                                                                                                                | 65%                                                                                                                          |
| White & Black African     | -2.2                      | 0.407                 | -0.3                                                                                    | 0.396                 | -1.9                                                                                                                | 87%                                                                                                                          |
| White & Black Asian       | -3.5                      | 0.325                 | -2.1                                                                                    | 0.317                 | -1.3                                                                                                                | 38%                                                                                                                          |
| Any other Mixed           | -4.4                      | 0.365                 | -2.7                                                                                    | 0.355                 | -1.7                                                                                                                | 39%                                                                                                                          |
| <b>South-Asian</b>        |                           |                       |                                                                                         |                       |                                                                                                                     |                                                                                                                              |
| Indian                    | -8.1                      | 0.093                 | -4.7                                                                                    | 0.101                 | -3.4                                                                                                                | 42%                                                                                                                          |
| Pakistani                 | -9.2                      | 0.121                 | -5.0                                                                                    | 0.133                 | -4.2                                                                                                                | 46%                                                                                                                          |
| Bangladeshi               | -10.2                     | 0.212                 | -6.3                                                                                    | 0.220                 | -3.9                                                                                                                | 38%                                                                                                                          |
| Any other Asian           | -5.1                      | 0.178                 | -2.5                                                                                    | 0.176                 | -2.6                                                                                                                | 50%                                                                                                                          |
| <b>Black</b>              |                           |                       |                                                                                         |                       |                                                                                                                     |                                                                                                                              |
| Black Caribbean           | -2.3                      | 0.138                 | 0.3                                                                                     | 0.139                 | -2.7                                                                                                                | > +/-100%                                                                                                                    |
| Black African             | -1.5                      | 0.129                 | 1.1                                                                                     | 0.130                 | -2.6                                                                                                                | > +/-100%                                                                                                                    |
| Any other Black           | -1.4                      | 0.358                 | 0.7                                                                                     | 0.349                 | -2.1                                                                                                                | > +/-100%                                                                                                                    |
| <b>Chinese</b>            |                           |                       |                                                                                         |                       |                                                                                                                     |                                                                                                                              |
| Chinese                   | -8.9                      | 0.208                 | -7.7                                                                                    | 0.205                 | -1.3                                                                                                                | 14%                                                                                                                          |
| <b>Other ethnic group</b> |                           |                       |                                                                                         |                       |                                                                                                                     |                                                                                                                              |
| Other ethnic              | -5.4                      | 0.073                 | -3.6                                                                                    | 0.074                 | -1.8                                                                                                                | 34%                                                                                                                          |

|                                                           | Overall difference | Standard error | Difference attributable to different evaluation of care within the same practice | Standard error | Difference attributable to concentration of different patient groups in practices with different mean scores | Percentage of overall difference attributable to patient group concentration in practices with different mean scores* |
|-----------------------------------------------------------|--------------------|----------------|----------------------------------------------------------------------------------|----------------|--------------------------------------------------------------------------------------------------------------|-----------------------------------------------------------------------------------------------------------------------|
| <b>Deprivation group</b>                                  |                    |                |                                                                                  |                |                                                                                                              |                                                                                                                       |
| '1' (least deprived)<br>[reference]                       |                    |                |                                                                                  |                |                                                                                                              |                                                                                                                       |
| '2'                                                       | 0.0                | 0.044          | 0.3                                                                              | 0.048          | -0.2                                                                                                         | > +/-100%                                                                                                             |
| '3'                                                       | -0.4               | 0.045          | 0.4                                                                              | 0.052          | -0.8                                                                                                         | > +/-100%                                                                                                             |
| '4'                                                       | -1.0               | 0.046          | 0.7                                                                              | 0.056          | -1.7                                                                                                         | > +/-100%                                                                                                             |
| '5' (most deprived)                                       | -0.5               | 0.047          | 1.4                                                                              | 0.061          | -1.9                                                                                                         | > +/-100%                                                                                                             |
| <b>Self-rated health status</b>                           |                    |                |                                                                                  |                |                                                                                                              |                                                                                                                       |
| Excellent (reference)                                     |                    |                |                                                                                  |                |                                                                                                              |                                                                                                                       |
| Very good                                                 | -3.5               | 0.054          | -3.3                                                                             | 0.052          | -0.2                                                                                                         | 6%                                                                                                                    |
| Good                                                      | -7.0               | 0.053          | -6.5                                                                             | 0.052          | -0.5                                                                                                         | 7%                                                                                                                    |
| Fair                                                      | -9.1               | 0.059          | -8.4                                                                             | 0.058          | -0.6                                                                                                         | 7%                                                                                                                    |
| Poor                                                      | -10.7              | 0.078          | -10.0                                                                            | 0.076          | -0.7                                                                                                         | 7%                                                                                                                    |
| <b>Long-standing psychological or emotional condition</b> |                    |                |                                                                                  |                |                                                                                                              |                                                                                                                       |
| "No" (reference)                                          |                    |                |                                                                                  |                |                                                                                                              |                                                                                                                       |
| "Yes"                                                     | 1.7                | 0.064          | 1.5                                                                              | 0.063          | 0.2                                                                                                          | 11%                                                                                                                   |

\*Proportions >100% reflect situations where differences attributable to different evaluation of care within the same practice, and differences attributable to concentration of different patient groups in practices with different mean scores are opposite in direction.

**Online appendix 2. Mean socio-demographic group difference (percentile points) and degree of consistency in socio-demographic differences across practices (indicated by the respective 95% midrange), by patient experience measure**

|                                               | Ethnic group <sup>a</sup>    |                                      |             |                              |                                      |             |                              |                                      |             |                              |                                      |             |                              |                                      |             |
|-----------------------------------------------|------------------------------|--------------------------------------|-------------|------------------------------|--------------------------------------|-------------|------------------------------|--------------------------------------|-------------|------------------------------|--------------------------------------|-------------|------------------------------|--------------------------------------|-------------|
|                                               | Mixed                        |                                      |             | South-Asian                  |                                      |             | Black                        |                                      |             | Chinese                      |                                      |             | Other                        |                                      |             |
|                                               | Mean difference <sub>b</sub> | 95% midrange of practice differences |             | Mean difference <sub>b</sub> | 95% midrange of practice differences |             | Mean difference <sub>b</sub> | 95% midrange of practice differences |             | Mean difference <sub>b</sub> | 95% midrange of practice differences |             | Mean difference <sub>b</sub> | 95% midrange of practice differences |             |
|                                               |                              | Lower limit                          | Upper limit |
| <b>4. Helpfulness of receptionists</b>        | -2.9                         | -14.5                                | 8.6         | -5.6                         | -15.6                                | 4.4         | 1.0                          | -4.2                                 | 6.2         | -6.5                         | -15.6                                | 2.7         | -2.7                         | -9.7                                 | 4.3         |
| <b>5a. Getting through on the phone</b>       | -1.8                         | -10.3                                | 6.7         | -4.1                         | -13.5                                | 5.3         | -0.1                         | -7.6                                 | 7.5         | -5.0                         | -16.8                                | 6.8         | -1.5                         | -7.5                                 | 4.5         |
| <b>7. Ability to get urgent appointment</b>   | -4.0                         | -30.4                                | 22.4        | -4.7                         | -20.3                                | 11.0        | -2.1                         | -15.2                                | 11.0        | -1.9                         | -26.2                                | 22.4        | -2.5                         | -14.6                                | 9.6         |
| <b>10. Ability to book ahead</b>              | -2.5                         | -20.5                                | 15.5        | -6.9                         | -23.0                                | 9.3         | -2.1                         | -13.1                                | 8.9         | -1.2                         | -22.2                                | 19.9        | -2.4                         | -12.0                                | 7.3         |
| <b>14. Evaluation of surgery waiting time</b> | -4.9                         | -22.3                                | 12.5        | -9.2                         | -23.4                                | 4.9         | -2.7                         | -12.2                                | 6.8         | -9.1                         | -32.9                                | 14.7        | -4.5                         | -15.0                                | 5.9         |
| <b>16. Seeing the doctor you prefer</b>       | -7.2                         | -26.3                                | 12.0        | -8.9                         | -20.2                                | 2.4         | -7.9                         | -20.4                                | 4.5         | -11.7                        | -30.2                                | 6.7         | -6.5                         | -16.1                                | 3.1         |
| <b>17. Satisfaction with opening hours</b>    | -3.1                         | -16.0                                | 9.8         | -4.7                         | -12.9                                | 3.4         | 0.7                          | -6.0                                 | 7.4         | -8.9                         | -24.4                                | 6.6         | -2.6                         | -9.1                                 | 4.0         |
| <b>20. Doctor communication</b>               | -3.9                         | -16.1                                | 8.2         | -4.3                         | -12.6                                | 4.0         | -1.4                         | -7.9                                 | 5.0         | -8.5                         | -18.3                                | 1.3         | -4.3                         | -11.7                                | 3.1         |
| <b>21. Confidence and trust in doctor</b>     | -4.9                         | -21.7                                | 11.9        | -4.0                         | -13.7                                | 5.8         | -2.2                         | -11.3                                | 6.9         | -10.8                        | -30.7                                | 9.0         | -5.8                         | -16.4                                | 4.8         |
| <b>24. Nurse communication</b>                | -3.4                         | -18.2                                | 11.5        | -5.9                         | -14.0                                | 2.1         | -2.2                         | -8.3                                 | 3.8         | -9.2                         | -23.6                                | 5.2         | -3.9                         | -12.0                                | 4.3         |
| <b>25. Overall care satisfaction</b>          | -3.9                         | -17.4                                | 9.7         | -6.1                         | -14.9                                | 2.8         | -0.8                         | -8.0                                 | 6.5         | -9.5                         | -22.5                                | 3.4         | -5.1                         | -12.8                                | 2.7         |

Online appendix 2 – continued

|                                               | Gender (women vs. men) <sup>a</sup> |                                      |             | Age group (18-25 vs. 75-84) <sup>a</sup> |                                      |             | Deprivation [group 1 (least deprived) vs. group 5 (most deprived)] <sup>a</sup> |                                      |             | Self-rated health status (self-rated health 'poor' vs. 'excellent') <sup>a</sup> |                                      |             | Long-standing psychological or emotional condition ['Yes' (vs. 'no')] <sup>a</sup> |                                      |             |
|-----------------------------------------------|-------------------------------------|--------------------------------------|-------------|------------------------------------------|--------------------------------------|-------------|---------------------------------------------------------------------------------|--------------------------------------|-------------|----------------------------------------------------------------------------------|--------------------------------------|-------------|------------------------------------------------------------------------------------|--------------------------------------|-------------|
|                                               | Mean difference <sub>b</sub>        | 95% midrange of practice differences |             | Mean difference <sub>b</sub>             | 95% midrange of practice differences |             | Mean difference <sub>b</sub>                                                    | 95% midrange of practice differences |             | Mean difference <sub>b</sub>                                                     | 95% midrange of practice differences |             | Mean difference <sub>b</sub>                                                       | 95% midrange of practice differences |             |
|                                               |                                     | Lower limit                          | Upper limit |                                          | Lower limit                          | Upper limit |                                                                                 | Lower limit                          | Upper limit |                                                                                  | Lower limit                          | Upper limit |                                                                                    | Lower limit                          | Upper limit |
| <b>4. Helpfulness of receptionists</b>        | -0.7                                | -3.2                                 | 1.7         | 8.1                                      | 8.1                                  | 8.1         | 1.0                                                                             | -2.3                                 | 4.4         | 1.2                                                                              | -4.4                                 | 6.8         | 0.6                                                                                | -4.0                                 | 5.2         |
| <b>5a. Getting through on the phone</b>       | -1.4                                | -4.4                                 | 1.6         | 2.6                                      | 2.6                                  | 8.5         | 1.8                                                                             | -4.1                                 | 7.7         | 6.9                                                                              | -1.1                                 | 14.8        | 0.5                                                                                | -3.6                                 | 4.5         |
| <b>7. Ability to get urgent appointment</b>   | 0.2                                 | -1.9                                 | 2.2         | 5.3                                      | 5.3                                  | 5.3         | -1.4                                                                            | -8.6                                 | 5.8         | 3.8                                                                              | -2.5                                 | 10.0        | -0.9                                                                               | -10.0                                | 8.2         |
| <b>10. Ability to book ahead</b>              | -3.5                                | -11.4                                | 4.3         | 5.2                                      | 5.2                                  | 5.2         | -1.9                                                                            | -7.1                                 | 3.3         | 5.8                                                                              | -3.9                                 | 15.6        | 0.6                                                                                | -6.2                                 | 7.4         |
| <b>14. Evaluation of surgery waiting time</b> | -2.4                                | -7.1                                 | 2.3         | 6.6                                      | 6.6                                  | 6.6         | -1.0                                                                            | -5.5                                 | 3.5         | 4.0                                                                              | -4.1                                 | 12.1        | -1.6                                                                               | -8.9                                 | 5.7         |
| <b>16. Seeing the doctor you prefer</b>       | -3.3                                | -7.9                                 | 1.3         | 8.3                                      | 8.3                                  | 8.3         | -1.7                                                                            | -6.2                                 | 2.8         | -1.7                                                                             | -3.9                                 | 0.5         | 2.1                                                                                | -1.7                                 | 5.9         |
| <b>17. Satisfaction with opening hours</b>    | 0.7                                 | -0.7                                 | 2.1         | 7.2                                      | 7.2                                  | 7.2         | 2.5                                                                             | -0.2                                 | 5.3         | 2.2                                                                              | -2.1                                 | 6.5         | 1.5                                                                                | -2.4                                 | 5.4         |
| <b>20. Doctor communication</b>               | -0.4                                | -2.6                                 | 1.9         | 4.6                                      | 4.6                                  | 4.6         | -0.3                                                                            | -3.9                                 | 3.3         | 6.1                                                                              | -0.3                                 | 12.5        | 0.7                                                                                | -5.4                                 | 6.8         |
| <b>21. Confidence and trust in doctor</b>     | -1.4                                | -4.2                                 | 1.4         | 5.9                                      | 5.9                                  | 5.9         | -0.8                                                                            | -5.4                                 | 3.9         | 7.7                                                                              | 0.6                                  | 14.7        | 0.3                                                                                | -5.9                                 | 6.6         |
| <b>24. Nurse communication</b>                | -0.5                                | -2.8                                 | 1.7         | 3.2                                      | 3.2                                  | 3.2         | 0.6                                                                             | -2.2                                 | 3.4         | 5.9                                                                              | 1.6                                  | 10.2        | 0.0                                                                                | -5.9                                 | 5.9         |
| <b>25. Overall care satisfaction</b>          | -0.4                                | -2.4                                 | 1.6         | 5.9                                      | 5.9                                  | 5.9         | 0.3                                                                             | -3.0                                 | 3.5         | 5.9                                                                              | -0.4                                 | 12.1        | 0.2                                                                                | -5.8                                 | 6.2         |

<sup>a</sup> All interaction (*case mix adjuster \* practice*) variance components were significant <0.0001 except for Mixed: question 5a, p=0.0004; Deprivation: question 10, p=0.0001; Self-rated health status: question 16, **p=0.1149**; Long-standing psychological or emotional condition: question 10, p=0.0002; question 16, p=0.0065.

<sup>b</sup> All differences <0.0001 except for Black: question 5a, **p=0.7168**; Chinese: question 7, p=0.0018 and question 10, **p=0.0871**; Women: question 7, p=0.0201; Long-standing psychological or emotional condition: question 10, p=0.0002; question 21, p=0.0015; question 24, **p=0.9603**; question 25, p=0.0013



### **Online Appendix 3. Additional references of studies providing evidence about socio-demographic variation in patient experience**

- i. Potiriadis M, Chondros P, Gilchrist G, Hegarty K, Blashki G, Gunn JM. How do Australian patients rate their general practitioner? A descriptive study using the General Practice Assessment Questionnaire. *Med J Aust.* 2008;189(4):215-9.
- ii. Bikker AP, Thompson AG. Predicting and comparing patient satisfaction in four different modes of health care across a nation. *Soc Sci Med.* 2006;63(6):1671-83.
- iii. DeVoe JE, Wallace LS, Fryer GE Jr. Measuring patients' perceptions of communication with healthcare providers: do differences in demographic and socioeconomic characteristics matter? *Health Expect.* 2009;12(1):70-80.
- iv. Ogden J, Jain A. Patients' experiences and expectations of general practice: a questionnaire study of differences by ethnic group. *Br J Gen Pract.* 2005;55(514):351-6.
- v. Elliott MN, Zaslavsky AM, Goldstein E, et al. Effect of survey mode, patient mix and non-response on CAHPS hospital survey scores. *Health Services Research* 2009;44:501-518.
- vi. O'Malley AJ, Zaslavsky AM, Elliott MN, Zaborski L, Cleary PD. Case-mix adjustment of the CAHPS Hospital Survey. *Health Serv Res.* 2005;40(6 Pt 2):2162-81.
